**Anterior insular cortex plays a critical role in interoceptive attention**

Xingchao Wang<sup>1,2\*</sup>, Qiong Wu<sup>3,4\*</sup>, Laura Egan<sup>5</sup>, Xiaosi Gu<sup>6-9</sup>, Pinan Liu<sup>1,2</sup>, Hong Gu<sup>10</sup>,  
Yihong Yang<sup>10</sup>, Jing Luo<sup>3</sup>, Yanhong Wu<sup>4,11,12</sup>, Zhixian Gao<sup>1,2</sup>, Jin Fan<sup>5-8</sup>

<sup>1</sup>Department of Neurosurgery, Beijing Tiantan Hospital, Capital Medical University,  
Beijing, China

<sup>2</sup>China National Clinical Research Center for Neurological Diseases, Beijing, China

<sup>3</sup>School of Psychology, Capital Normal University, Beijing, China

<sup>4</sup>School of Psychological and Cognitive Sciences, Peking University, Beijing, China

<sup>5</sup>Department of Psychology, Queens College, The City University of New York, New  
York, USA

<sup>6</sup>Department of Psychiatry, <sup>7</sup>Department of Neuroscience, <sup>8</sup>Friedman Brain Institute, and  
<sup>9</sup>Addiction Institute, Icahn School of Medicine at Mount Sinai, New York, USA

<sup>10</sup>Neuroimaging Research Branch, Intramural Research Program, National Institute on  
Drug Abuse, Baltimore, USA

<sup>11</sup>Beijing Key Laboratory of Behavior and Mental Health, <sup>12</sup>Key Laboratory of Machine  
Perception (Ministry of Education), Peking University, Beijing, China

\*X. W. and Q.W. contributed equally to this study.

Correspondence should be addressed to:

Yanhong Wu, Ph.D.

Department of Psychology, Peking University, Beijing, 100080, China

Email: [wuyh@pku.edu.cn](mailto:wuyh@pku.edu.cn)

Zhixian Gao, M.D.

Department of Neurosurgery

Beijing Tiantan Hospital, Capital Medical University, Beijing, 100050, China

Email: [gaozx@ccmu.edu.cn](mailto:gaozx@ccmu.edu.cn)

Jin Fan, Ph.D.

Department of Psychology

Queens College, The City University of New York, Queens, NY 11367, USA

Email: [jin.fan@qc.cuny.edu](mailto:jin.fan@qc.cuny.edu)

37

## Abstract

38 Although accumulating evidence indicates that the anterior insular cortex (AIC) mediates  
39 interoceptive attention, which refers the attention towards physiological signals arising  
40 from the body, the necessity of the AIC in this process has not been demonstrated. Using  
41 a novel task that directs attention toward breathing rhythm, we assessed the involvement  
42 of the AIC in interoceptive attention in healthy participants using functional magnetic  
43 resonance imaging and examined the necessity of the AIC in interoceptive attention in  
44 patients with AIC lesions. We found that interoceptive attention was associated with  
45 greater AIC activation, as well as enhanced coupling between the AIC and somatosensory  
46 area along with reduced coupling between AIC and visual sensory areas. AIC activation  
47 and connectivity were predictive of individual differences in interoceptive accuracy.  
48 Importantly, AIC lesion patients showed disrupted interoceptive discrimination accuracy  
49 and sensitivity. Together, these results provide compelling evidence that AIC plays a  
50 critical role in interoceptive attention.

51

52

## Introduction

53

54

55

56

57

58

59

60

61

62

63

64

65

66

67

68

69

70

71

72

73

74

As defined by William James in *Principles of Psychology*, attention is “taking possession by the mind, in clear and vivid form, of one out of what seem several simultaneous objects or trains of thought” (James, 1890). Thus, the target of attention can be either the external objects or the internal thoughts. Although external and internal attention have been extensively investigated, a third category of attention, the attentional mechanism in interoceptive awareness, which is the conscious focus on bodily somatic and visceral signals or responses (Craig, 2002, 2003, 2010; Critchley, 2005; Critchley, Wiens, Rotshtein, Ohman, & Dolan, 2004), i.e., the interoceptive attention, has been far less studied. Previous theories argue that subjective emotions arise from these bodily reactions and visceral experiences (Dolan, 2002) and that interoceptive awareness informs allostatic regulatory processes about the state of the body in order to maintain homeostasis (Gu & FitzGerald, 2014). Thus, appropriate attention to bodily states and accurate perception of interoceptive information are essential in emotional awareness and in the maintenance of normal physiological conditions. Recent human studies emphasize the role of the insula in interoceptive representations (Daubenmier, Sze, Kerr, Kemeny, & Mehling, 2013; Farb, Segal, & Anderson, 2013b; Ronchi et al., 2015). Neuroanatomical evidence, consistent with neuroimaging findings, suggest that the anterior insular cortex (AIC) is an important structure for encoding and representing interoceptive information (Craig, 2002, 2003, 2009; Critchley et al., 2004; Stephani, Fernandez-Baca Vaca, Maciunas, Koubeissi, & Luders, 2011).

Although the AIC has been recognized as an interoceptive cortex (Craig, 2003; Critchley et al., 2004; Ernst et al., 2014; Singer, Critchley, & Preusschoff, 2009; Terasawa,

75 Fukushima, & Umeda, 2013), these findings remain equivocal because AIC activation  
76 seems ubiquitous across a wide range of tasks involving cognition, emotion, and other  
77 cognitive processes in addition to interoceptive attention (Gu, Hof, Friston, & Fan, 2013;  
78 Uddin, Kinnison, Pessoa, & Anderson, 2014). In addition, the correlational AIC  
79 activation found in functional neuroimaging studies alone does not provide causal  
80 evidence for its role in interoceptive attention, leaving the question of whether the AIC is  
81 critical in interoceptive attention unanswered. Studying patients with focal lesions in the  
82 AIC (e.g., in Gu et al., 2012; Gu et al., 2015; Ronchi et al., 2015; Starr et al., 2009; Wang  
83 et al., 2014) would thus provide a unique opportunity to examine the necessity of the AIC  
84 in this fundamental process.

85         One challenge to studying interoceptive attention is the vague nature of  
86 interoceptive awareness. With the classic definition of attention by James (1890), only the  
87 contents that are clearly perceived and represented by the mind can be the target of  
88 attention. However, most existing tasks measuring interoceptive attention fail to meet this  
89 criterion. In contrast to exteroceptive attention towards external sensory inputs, it is  
90 difficult to obtain precise measurements of interoceptive attention experimentally because  
91 of the imprecise perception of visceral changes such as heart rate (Paulus & Stein, 2010;  
92 Ring, Brener, Knapp, & Mailloux, 2015; Windmann, Schonecke, Frohlig, & Maldener,  
93 1999). Multiple sources of physical information contribute to bodily signals and most of  
94 these sources of somatic feedback cannot be described accurately by mindful  
95 introspection in normal physiological status (Ring et al., 2015). This limitation impedes  
96 accurate measurement of interoceptive attention and examination of the neural  
97 mechanisms underlying this process. To overcome this barrier, a perceivable visceral

98 channel needs to be used.

99 Breathing is an essential activity to maintain human life, and more importantly, is  
100 an easily perceivable internal bodily signal. Breathing, as an autonomous vital movement,  
101 can also be measured and actively controlled in humans (Daubenmier et al., 2013;  
102 Davenport, Chan, Zhang, & Chou, 2007). The unique physiological characteristics of  
103 respiration make breath detection an ideal method to measure interoceptive  
104 accuracy/sensitivity (Garfinkel, Seth, Barrett, Suzuki, & Critchley, 2015) and to explore  
105 the neural activity underlying interoceptive attention. Thus, we designed a breath  
106 detection task to engage interoceptive attention (attention to bodily signals), in which  
107 participants were required to indicate whether a presented breathing curve is delayed or  
108 not relative to their own breathing effort (breath detection task, BDT), in contrast to  
109 engage exteroceptive attention (attention to visual signals), in which participants were  
110 required to indicate whether a visual dot stimulus is flashed on the breathing curve (dot  
111 flash detection task, DDT). This design enabled us to examine the involvement of the  
112 AIC in interoceptive processing in healthy participants and the necessity of the AIC in  
113 this processing in patients with AIC lesions.

114 Based on previous evidence (e.g., Critchley, 2004), we hypothesized that AIC is  
115 critical in interoceptive attention for the integration of information from an individual's  
116 homeostatic state and the external environment to reach subjective awareness. We first  
117 conducted fMRI studies with two samples to map the neural substrates underlying  
118 interoceptive attention to internal bodily signals in contrast to exteroceptive attention to  
119 external visual signals in healthy participants while they performed the tasks. We then  
120 investigated the necessity of AIC in interoceptive attention by assessing interoceptive

121 attention in patients with focal AIC lesions, compared to brain-damaged controls (patients  
122 with lesions in areas other than insular or somatosensory related cortices) and matched  
123 neurologically intact controls. We predicted that the AIC would be involved in  
124 interoceptive attention and that patients with AIC lesions would show deficits in  
125 performance on the interoceptive, but not exteroceptive, attention task.

## 126 **Methods**

### 127 **Task design**

#### 128 *Task implementations*

129 A respiratory transducer (TSD201, MRI compatible, BIOPAC Systems Inc.),  
130 which was fastened around the participants' upper chest, was utilized to record breathing  
131 effort by measuring thoracic changes in circumference occurring during respiration. The  
132 signal for the change in circumference was sampled at 1000Hz using the BIOPAC  
133 MP150/RSP100C system, passing through a DC amplifier with low-pass filtering at 1Hz  
134 and high-pass filtering at .05Hz, and gain set to 10V. Analog signal was then digitized by  
135 an A/D converter (USB-1208HS-4AO, Measurement Computing, Inc.) and sent to a USB  
136 port of the test computer (Figure 1a). The task program in E-Prime™ (Psychology  
137 Software Tools, Pittsburgh, PA, USA) served as an interface through which the digitized  
138 signal from the USB port was received and presented to the participants on the computer  
139 screen as a continuous blue breath curve extending from left to right as time elapsed  
140 (Figure 1b), which was representative of their breathing effort. The breath curve was  
141 presented either with or without a delay (Figure 1c).

142 For the engagement of interoceptive attention during BDT, participants were  
143 required to judge whether the presented breath curve was delayed compared to the breath

144 rhythm they perceived from their body. There were two levels for the manipulation of  
145 BDT: Non-delayed and Delayed. In half of the trials, the displayed breath curve was  
146 synchronized with the participant's own respiration. In the other half, the displayed breath  
147 curve was delivered after a 400-ms delay period compared to the participant's own  
148 respiration (i.e., the plotting of the point on the extending curve was actually the point  
149 saved 400 ms before the current time point). Note that the parameter of 400 ms delay was  
150 determined based on a proportion ( $\sim 1/10$ ) of an average respiratory cycle of normal  
151 healthy people which is 3~4 s/cycle. For the engagement of exteroceptive attention, the  
152 DDT was performed. Participants were instructed to detect whether a red dot flashed on  
153 the respiratory curve at any time when the breath curve was displayed. There were also  
154 two levels for the DDT: dot did not appear (No dot) and dot appeared (Dot). In half of the  
155 trials, a red dot flashed (30 ms for the fMRI experiment, and 50 ms for the lesion study)  
156 at a randomized time point on the breath curve. Figure 1b illustrates the two tasks. These  
157 two tasks constituted 4 trial conditions of a 2 (BDT: non-delayed, delayed) by 2 (DDT:  
158 no dot, dot) factorial design (Figure 1c), and therefore constituted four trial types,  
159 reflecting presence and absence of feedback delay and presence and absence of a red dot  
160 flash, presented in a random order in each run. During the two tasks, participants were  
161 instructed to breath as usual without holding or forcing their breath.

162 Participants were asked to perform each task in a blocked fashion in the  
163 Interoceptive and Exteroceptive runs. The fMRI experiment consisted of two runs, with  
164 one run for the interoceptive task and the other run for the exteroceptive task. There were  
165 60 trials per run. Each run began and ended with a 30 s blank display, each trial lasted 18  
166 s, with an average of 2 s inter trial interval, for a total of 21 minutes per run. Each trial

167 began with a 3-s relax display, followed by a 12-s respiratory curve presented with or  
168 without an addition of 400 ms delay, and ended with a 3-s response window during which  
169 participant made a forced-choice button-press response, prompted by presentation of two  
170 alternative choices for participants to indicate their response (Figure 1b). The inter-trial  
171 interval was 2 s. After the fMRI scan, participants were asked to indicate the subjective  
172 difficulty they felt for each task on a 1 – 10 scale with higher value indicating feeling  
173 more difficult. For the lesion study, the same tasks were employed, one run for each task,  
174 with 40 trials in each run.

#### 175 *Behavioral data analysis*

176 Interoceptive attention is associated with objective *accuracy* in detecting bodily  
177 signals, subjective belief in one’s ability to detect bodily signals in general (i.e.,  
178 *sensibility*), and the correspondence between objective accuracy and subject report (i.e.,  
179 metacognitive *awareness* about one’s performance when detecting bodily signals)  
180 (Garfinkel & Critchley, 2013; Garfinkel et al., 2015). Objective  
181 interoceptive/exteroceptive accuracy was calculated as the overall correct response rate  
182 during interoceptive/exteroceptive task. In addition, we also used signal detection theory  
183 to index detection sensitivity and response bias. Signal detection theory characterizes  
184 how perceivers separate signal from noise, assuming that the perceiver has a distribution  
185 of internal responses for both signal and noise (Snodgrass & Corwin, 1988; Stanislaw &  
186 Todorov, 1999). A fundamental advantage of signal detection theory is the distinction  
187 between sensitivity (ability to discriminate alternatives) and bias (propensity to categorize  
188 ‘signal’ or ‘noise’). For the BDT, the sensitivity index ( $d'$ ) was calculated as  $d' = Z_{hit\ rate} -$   
189  $Z_{false\ alarm\ rate}$ , where the hit rate is the proportion of trials with correct response to delayed



190 breath curve present and response ‘yes’, and the false alarm rate is the proportion of trials  
191 with non-delayed breath curve presented and responded as ‘yes’ of delayed. A higher  
192 value of  $d'$  indicates a better interoceptive sensibility, while a value of 0 represents  
193 performance at chance level. The response bias index ( $\beta$ ), representing the position of the  
194 subject’s decision criterion, was defined as  $\beta = \exp(d' \times C)$ , where  $C = -(Z_{hit\ rate} + Z_{false$   
195  $alarm\ rate})/2$ . Index  $\beta$  corresponds to the distance of participants’ estimated criterion to ideal  
196 observer criterion, and a value of 1 indicates no bias. For the DDT, indices of  $d'$  and  $\beta$   
197 were calculated using the same formula, with the dot present as ‘signal’ and dot absent as  
198 ‘noise’. Relative interoceptive accuracy was defined as the difference of performance  
199 accuracy between BDT and DDT to control for non-specific performance effects  
200 (Critchley et al., 2004).

201 An individual’s subjective account of how they experience internal sensation and  
202 perception represents an alternative aspect of interoceptive processing, namely sensibility  
203 (Garfinkel et al., 2015). In the fMRI experiment, the subjective sensibility of  
204 interoceptive processing was quantified using the self-report questionnaire of Body  
205 Perception Questionnaire (BPQ) (Porges, 1993). Subjective perception of one’s  
206 performance during an interoceptive task represents the awareness aspect of interoceptive  
207 attention (Garfinkel et al., 2015), which was measured via the subjectively scored  
208 difficulty of interoceptive task relative to exteroceptive task. The correlation between the  
209 relative interoceptive accuracy and these indices of subjective sensibility and awareness  
210 was calculated to examine the relationship between the perceived (subjective) and actual  
211 measured (objective) performance of interoceptive attention.

212 **fMRI experiments**

213 *Participants*

214 fMRI experiments included two samples of participants: the first sample included  
215 44 adults (23 females and 21 males, mean age  $\pm$  standard deviation:  $21.43 \pm 2.51$  years,  
216 age range: 19-29 years) and the second sample included additional 28 adults (14 females  
217 and 14 males, mean age  $\pm$  standard deviation:  $21.93 \pm 2.11$  years, age range: 18-26 years).  
218 All participants underwent the same experimental procedures, except that pulse and  
219 respiratory signals were recorded for the second sample using the pulse sensor (Siemens  
220 Peripheral Pulse Unit, PPU\_098) of the scanner and BIOPAC, respectively. All  
221 participants (except for one participant) were right-handed, reported normal or  
222 corrected-to-normal vision, and had no known neurological or visual disorders. All  
223 participants completed questionnaires indexing subjective interoceptive sensibility (BPQ),  
224 symptoms of anxiety (Hamilton anxiety scale, HAMA (Hamilton, Schutte, & Malouff,  
225 1976)), depression (Beck Depression Inventory, BDI (Knight, 1984)), and positive and  
226 negative affective experience (PANAS) (Watson, 1988). They gave written informed  
227 consent in accordance with the procedures and protocols approved by The Human  
228 Subjects Review Committee of Peking University.

229 *fMRI data acquisition and preprocessing*

230 During functional scanning, participants performed the interoceptive and  
231 exteroceptive tasks in separate runs that required them to attend to either their respiration  
232 or a visual flash dot, respectively. All neuroimaging data were acquired on a  
233 MAGNETOM Prisma 3T MR scanner (Siemens, Erlangen, Germany) with a 64-channel  
234 phase-array head-neck coil. During the tasks, blood oxygen level-dependent (BOLD)  
235 signals were acquired with a prototype simultaneous multi-slices echo-planar imaging

236 (EPI) sequence (echo time, 30 ms; repetition time, 2000 ms; field of view, 224 mm x 224  
237 mm; matrix,  $112 \times 112$ ; in-plane resolution,  $2 \text{ mm} \times 2 \text{ mm}$ ; flip angle, 90 degree; slice  
238 thickness, 2.1 mm; gap, 10%; number of slices, 64; slice orientation, transversal;  
239 bandwidth, 2126 Hz/Pixel; slice acceleration factor, 2). For the second cohort, the  
240 thickness was changed to 2 mm with the gap of 15%, and the number of slices was  
241 changed to 62. Field map images were acquired using a vendor-provided Siemens  
242 gradient echo sequence (gre field mapping: echo time 1, 4.92 ms; echo time 2, 7.38 ms;  
243 repetition time, 635 ms; flip angle, 60 degree; bandwidth, 565 Hz/Pixel) with the same  
244 geometry and orientation as the EPI image. A high-resolution 3D  $T_1$  structural image (3D  
245 magnetization-prepared rapid acquisition gradient echo;  $0.5 \text{ mm} \times 0.5 \text{ mm} \times 1 \text{ mm}$   
246 resolution) was also acquired. Image preprocessing was performed using Statistical  
247 Parametric Mapping package (SPM12; Wellcome Department of Imaging Neuroscience,  
248 London, United Kingdom). EPI volumes were realigned to the first volume, corrected for  
249 geometric distortions using the field map, coregistered to the  $T_1$  image, normalized to a  
250 standard template (Montreal Neurological Institute, MNI), resampled to  $2 \times 2 \times 2 \text{ mm}^3$   
251 voxel size, and spatially smoothed with an isotropic 8 mm full-width at half-maximum  
252 (FWHM) Gaussian kernel.

253 *fMRI: whole brain analysis for the first sample*

254 *Image statistical parametric mapping*

255 Imaging data from the two samples were analyzed separately and independently,  
256 with the exploratory whole brain analysis conducted with the first sample and the  
257 confirmatory region of interest (ROI) analysis conducted with the second sample. For the  
258 whole brain analysis of the first sample, statistical inference was based on a random

259 effects approach (Penny & Holmes, 2007), which comprised two steps: first-level  
260 analyses estimating contrasts of interest for each subject followed by second-level  
261 analyses for statistical inference at the group level. For each participant, first-level  
262 statistical parametric maps of BOLD signals were modeled using general linear modeling  
263 (GLM) with regressors defined for each session with the four trial types: 2 breath curve  
264 delay (non-delayed, delayed)  $\times$  2 dot present (no dot, dot). The corresponding four  
265 regressors were generated by convolving the onset vectors of each trial type with a  
266 standard canonical hemodynamic response function (HRF). Six parameters generated  
267 during motion correction were entered as covariates of no interest. The time series for  
268 each voxel were high-pass filtered (1/128 Hz cutoff) to remove low-frequency noise and  
269 signal drift.

270 Contrast maps for interoceptive attention (interoceptive task – exteroceptive task),  
271 the breath curve delay (delayed – non-delayed), and the interaction between them  
272 ( $[\text{delayed} - \text{non-delayed}]_{\text{interoceptive task}} - [\text{delayed} - \text{non-delayed}]_{\text{exteroceptive task}}$ ) for each  
273 participant were entered into a second-level group analysis conducted with a  
274 random-effects model that accounts for inter-subject variability and permits  
275 population-based inferences. A Monte Carlo simulation using the AlphaSim program  
276 (<http://afni.nimh.nih.gov/pub/dist/doc/manual/AlphaSim.pdf>) was conducted to determine  
277 an appropriate cluster threshold. A cluster extent of 193 contiguous voxels was indicated  
278 as necessary to correct for multiple comparisons at  $p < 0.05$  with a voxelwise  $p$  value at  
279 0.001 (estimated smoothness FWHM = 11.57 mm  $\times$  12.43 mm  $\times$  11.59 mm, Resels =  
280 208.44, Volume = 238955). Note that changes in neural activity revealed by the main  
281 effect of interoceptive attention (the contrast of interoceptive versus exteroceptive

282 condition) could also reflect task specific effects (i.e., task difficulty) or respiratory  
283 characteristics (i.e., amplitude and frequency), in addition to effect of change in  
284 attentional focus. Although the main effect of interoceptive attention is subject to this  
285 confounding, the interaction effect should not be confounded by the change in respiratory  
286 characteristics. This interaction reflects the brain response to the mismatch (delay versus  
287 non-delayed) during interoceptive processing controlling for the non-specific effect (i.e.,  
288 the difference in feedback stimulus of delay and non-delayed under the exteroception task  
289 condition). Therefore, a positive interaction effect represents brain response to the  
290 interoceptive processing above and beyond the physical feedback difference.

291 *Correlation between interoceptive accuracy and the interaction effect of the AIC*

292 To test for a linear correlation between AIC activity and behavioral performance  
293 on the interoceptive task, we entered each participant's interaction contrast maps into the  
294 second-level random effect group regression analysis, together with their individual  
295 accuracy in the interoceptive task as the variable of interest and accuracy in the  
296 exteroceptive task as the covariate. Threshold of significance was at  $p < 0.05$  with a  
297 voxelwise  $p$  value of 0.01 and a cluster extent of 34 contiguous voxels, corrected using  
298 small-volume region-of-interest correction for multiple comparisons using AlphaSim  
299 program. The mask image was generated from an anatomical template of bilateral insular  
300 cortex based on the Automated Anatomical Labeling (AAL) template (Tzourio-Mazoyer  
301 et al., 2002).

302 *Psychophysiological interaction (PPI) analysis*

303 PPI analysis provides a measure of change in functional connectivity between  
304 different brain regions under a specific psychological context (Friston et al., 1997). We

305 conducted PPI analyses using a moderator derived from the product of the activity of a  
306 seed region (i.e., the AIC) and the psychological context (i.e., interoceptive in contrast to  
307 exteroceptive task). The region of interest (ROI) selection was independent of the  
308 interoceptive attention process that was used as psychological context. The left and right  
309 AIC were first identified from the main effect of the breath curve delay (the contrast of  
310 delayed versus non-delayed) in the GLM. We then conducted two whole-brain PPI tests  
311 for right and left AIC, reflecting changes in functional connectivity between the seed  
312 region time series (physiological regressor) and other brain regions as a function of  
313 interoceptive relative to exteroceptive attention (psychological regressor). The AIC time  
314 series of each participant were extracted from a 6-mm radius sphere centered at the peak  
315 of AIC (right AIC:  $x = 30, y = 26, z = -4$ ; left AIC:  $x = -30, y = 24, z = -4$ ). The PPI term  
316 was calculated as element-by-element product of the deconvolved physiological regressor  
317 and psychological regressor, which was then reconvolved with the canonical HRF. The  
318 PPI model generated included the PPI term, the physiological regressor, the  
319 psychological regressor, and nuisance regressors of six motion parameters. Threshold of  
320 significance for the second-level group data analysis of the images from PPI regressor  
321 was determined the same as in the GLM. Regions identified as significant clusters have  
322 two possible interpretations: (1) the connectivity between the AIC and those regions was  
323 altered by the psychological context, or (2) the response of those regions to the  
324 psychological context is modulated by AIC activity. To simplify the explanation, we used  
325 the first interpretation throughout this article.

326 *Dynamic causal modeling (DCM)*

327 DCM (Friston, Harrison, & Penny, 2003) is a Bayesian model comparison

328 procedure to infer effective connectivity between brain regions by estimating direct  
329 interactions on neuronal level. DCM distinguishes between endogenous coupling and  
330 context-specific coupling, which could account for the effects of experimentally  
331 controlled network perturbations. Due to the inherent limited causal interpretability of the  
332 PPI analysis for the direction of interaction, we only conducted DCM to explain the  
333 potential mechanisms of the interplay between AIC and other brain areas involved during  
334 interoceptive attention. The ROI of the right AIC in the DCM was the same as in the PPI  
335 analysis. The other regions included in the DCM were selected based on significant  
336 positive and negative PPI results and with the coordinates of the ROIs identified by the  
337 group level T-contrast of all conditions versus baseline. Data from six participants was  
338 excluded from DCM analysis because activity in one of the ROIs could not be identified.

339         A three-area DCM was specified for all participants with bidirectional  
340 endogenous connection between right AIC and the two other ROIs, and with the main  
341 effect of “all stimuli” as the driving input entering into the two other ROIs. Five base  
342 models were generated by specifying possible modulations of interoceptive and  
343 exteroceptive attention on the four endogenous connections between ROIs. These base  
344 models were then systematically elaborated to produce 52 variant models, which include  
345 all possible combination of the modulation of interoceptive and exteroceptive attention  
346 on endogenous connections between right AIC and the two other ROIs.

347         Model comparison was implemented using random-effects (RFX) Bayesian  
348 model selection (BMS) in DCM12 to determine the most likely model of the 52 models  
349 given the observed data from all participants (Stephan, Penny, Daunizeau, Moran, &  
350 Friston, 2009). The RFX analysis computes exceedance and posterior probabilities at the

351 group level, and the exceedance probability of a given model denotes the probability that  
352 this model is more likely than all other models considered (Stephan et al., 2009). To  
353 summarize the strength of effective connectivity and its modulation quantitatively, we  
354 used random effects Bayesian model averaging (BMA) to obtain average connectivity  
355 estimates (weighted by their posterior model) across all models and all participants  
356 (Penny et al., 2010). We conducted one-sample t tests on the subject specific BMA  
357 parameter estimates to assess their consistency across subjects with Bonferroni correction  
358 for multiple comparisons.

359 *fMRI: ROI analyses for the second sample*

360       Whereas whole brain analyses of the first sample aimed at identifying brain areas  
361 involved in interoceptive processing, ROI analyses of the second sample aimed to  
362 confirm that the effects found from the first sample were not confounded with the effect  
363 induced by other physiological signals. Change in BOLD signals can be due to both  
364 direct neural activity (induced by experimental manipulation) and indirect effect (such as  
365 vascular response, which would be considered as a confounding effect). For example, the  
366 cerebral vascular response is sensitive to circulation of CO<sub>2</sub> and O<sub>2</sub>, and causes a change  
367 in global cerebral blood flow (CBF) and global BOLD signal. It is evident both in human  
368 and animals that the global CBF and global BOLD responses influence local  
369 stimulus-induced hemodynamic response to neural activation (Cohen, Ugurbil, & Kim,  
370 2002; Friston et al., 1990; Ramsay et al., 1993). Typically, a larger local stimulus-induced  
371 BOLD response occurs when global BOLD is lowered, while a smaller local  
372 stimulus-induced BOLD response occurs when global BOLD is elevated. In our study,  
373 the experimental manipulation of interoception was likely to cause a change in respiratory



374 characteristics (i.e., circulation of CO<sub>2</sub> and O<sub>2</sub>). The difference in physiologic states  
375 between the interoceptive and exteroceptive task conditions might cause a change in  
376 global BOLD signals, and thus the effect resulting from local interoception-related  
377 BOLD response would be confounded by the global hemodynamic influence.

378 To partial out the potential confounding, physiological data, including cardiac  
379 pulsation and respiratory volume collected in the second sample, were processed using  
380 PhLEM toolbox (<http://sites.google.com/site/phlemtoolbox/>). Physiological noise  
381 correction was implemented by regressing out cardiac- and respiratory-related effects,  
382 and their interaction effect, as noise from the fMRI signal using a modification of  
383 conventional RETROICOR approach (Brooks et al., 2008; Glover, Li, & Ress, 2000). In  
384 RETROICOR, a cardiac phase calculated from a pulse oximeter was assigned to each  
385 acquired image in a time series (Hu, Le, Parrish, & Erhard, 1995), and a respiratory phase  
386 was assigned to a corresponding image using the histogram equalized transfer function  
387 that takes both the respiratory timing and depth of breathing into account (Glover et al.,  
388 2000). Conventional RETROICOR approach (Glover et al., 2000) defines low-order  
389 Fourier terms (i.e., sine and cosine values of the principal frequency and the 2<sup>nd</sup> harmonic)  
390 to model the independent effects of the cardiac and respiratory fluctuation, which is  
391 considered insufficient to remove variations caused by physiological artifacts (Harley &  
392 Bielajew, 1992; Tijssen, Jenkinson, Brooks, Jezzard, & Miller, 2014). Therefore, we used  
393 additional terms of higher-order Fourier expansions (i.e., to the 5th harmonics) in  
394 RETROICOR, and formed multiplicative sine/cosine terms that take the interaction  
395 between cardiac and respiratory effect into account. Specifically, the interaction terms  
396 were calculated by  $\sin(\varphi_c \pm \varphi_r)$  and  $\cos(\varphi_c \pm \varphi_r)$  where  $\varphi_{c,r}$  is the cardiac or

397 respiratory phase, consisting of a mixture of 3<sup>rd</sup> order cardiac and 2<sup>nd</sup> order respiratory  
398 harmonics. Therefore, the modified RETROICOR approach contained a total of 44  
399 regressors, with 20 of them from independent cardiac and respiratory effects and 24 of  
400 them from interaction terms. Statistical parametric maps were generated using the same  
401 GLM as in the above whole brain analyses, with motion parameters and these  
402 physiological regressors entered as covariates of no interest.

403         To avoid double dipping, ROIs were defined based on the first sample.  
404 Specifically, ROIs (i.e. left and right AIC) were the clusters of the second-level group  
405 analysis results of the interaction effect ([delayed – non-delayed]<sub>interoceptive task</sub> – [delayed  
406 – non-delayed]<sub>exteroceptive task</sub>). Parameter estimates were extracted from each ROI in the  
407 second sample for each of the 4 experimental conditions of each participant, and then  
408 entered into a two-way repeated measures analysis of variance model. We also examined  
409 correlations between the interaction effect of each ROI and behavior measures (i.e.,  
410 relative interoceptive accuracy) across participants.

411         To further confirm that the result was not dependent on the (independent of) ROI  
412 selection, we explored the influence of physiological noise by comparing the whole brain  
413 activations related to interoception without and with physiological correction at an  
414 extremely permissive threshold (voxelwise  $p < 0.05$  uncorrected).

## 415 **Lesion study**

### 416 *Brain lesion patient and control groups*

417         Six male patients (33-53 years old, mean  $42.17 \pm 7.31$  years) with focal unilateral  
418 insular cortex lesions participated in the lesion study (see Supplementary Table 1 for  
419 patient characteristics). Two patients had a right-side lesion, and four patients had a

420 left-side lesion. In addition, six patients with focal lesions in regions other than insular  
421 cortex (i.e., temporal pole,  $n = 3$ , lateral frontal cortex,  $n = 2$ , and superior temporal gyrus,  
422  $n = 1$ ) were recruited as brain-damaged controls (BDCs), and 12 neurologically intact  
423 participants were recruited as normal controls (NCs). All lesions resulted from surgical  
424 removal of low-grade gliomas. All patients were recruited from the Patient's Registry of  
425 Tiantan Hospital, Beijing, China. NC participants were recruited in the local community.  
426 All NC participants were right-handed, had normal color vision, and reported no previous  
427 or current neurological or psychiatric disorders. BDC patients matched with patients with  
428 insular cortex lesion in chronicity, and neither group significantly differed from NC group  
429 in age and education ( $ps > 0.05$ ). All six insular lesion patients were considered  
430 cognitively intact, measured by Mini-Mental State Examination (MMSE), a measurement  
431 of cognitive impairment (Folstein, Folstein, & McHugh, 1975), and the raw scores of  
432 MMSE were not statistically different from either BDCs ( $p > 0.05$ ) or NCs ( $p > 0.05$ ).  
433 Patients with insular lesions did not show alteration in baseline mood as indexed by BDI  
434 score, compared to NCs or BDCs ( $ps > 0.05$ ). See Supplementary Table 1 for  
435 demographic information of the groups. Note that by chance, all of the AIC lesion  
436 patients were male. We conducted additional statistical analyses to compare the AIC  
437 patients to only male controls to examine whether there was the potential confound of  
438 gender difference (see lesion study results). All participants were informed of the study  
439 requirements and provided written consent prior to participation. The patient study was  
440 approved by the Institutional Review Board of the Beijing Tiantan Hospital, Capital  
441 Medical University.  
442 *Lesion reconstruction*

443 Two neurosurgeons, blind to the experimental design and behavioral results,  
444 identified and mapped the lesions of each patient onto a template derived from a digital  
445 MRI volume of a normal control (ch2bet.nii) embedded in the MRIcro program  
446 (<http://www.cabiatl.com/mricro/mricro/index.html>). In each case, lesions evident on MRI  
447 were transcribed onto corresponding sections of the template in order to create a volume  
448 of interest image. This was used to measure the location (in MNI coordinates) and  
449 volume (in ml) of individual lesions and to create within group overlaps of lesions using  
450 the MRIcro program.

451 *Behavioral data analysis of the lesion study*

452 We used the non-parametric bootstrapping method (Hasson, Avidan, Deouell,  
453 Bentin, & Malach, 2003; Mooney & Duval, 1993) to assess the probability of observing a  
454 significant difference between two groups (AIC versus NC, AIC versus BDC) because  
455 the small sample data sets did not meet the assumption of parametric tests. The  
456 bootstrapping procedure was conducted with 10,000 iterations (details referred to (Gu et  
457 al., 2012)). If the probability of obtaining the observed t-value is less than 5%  
458 (one-tailed), we considered the difference between the two groups to be significant. We  
459 used one-tailed tests because of the hypothesis that lesions of a specific brain region (i.e.,  
460 the AIC) would induce deficits in behavioral response. In addition, we calculated Bayes  
461 factors | uniform ( $B_u$ ) to determine the relative strength of evidence for null and alternative  
462 hypotheses (Dienes, 2014; Dienes & McLatchie, 2018). The value of B means that the data  
463 are B times more likely under the alternative than under the null hypothesis. The  
464 conventional standard for assessing substantial evidence for the null is a value of  $B < 1/3$   
465 and for the theory against null is a value of  $B > 3$ , while values between  $1/3$  and  $3$  are

466 counted as data insensitivity. The Bayes factors were calculated using free online Bayes  
467 calculator ([http://www.lifesci.sussex.ac.uk/home/Zoltan\\_Dienes/inference/Bayes.htm](http://www.lifesci.sussex.ac.uk/home/Zoltan_Dienes/inference/Bayes.htm)) by  
468 specifying a uniform distribution with all population parameter values from the lower to  
469 the upper limit equally plausible.

## 470 Results

### 471 Behavioral results of the fMRI studies

472 Performance accuracy (%) and discrimination sensitivity ( $d'$ ) in the interoceptive  
473 task were  $82.1 \pm 14.7\%$  and  $2.2 \pm 1.1$  (Mean  $\pm$  SD) for the first sample, and  $74.9 \pm 9.6\%$   
474 and  $1.6 \pm 0.6$  (Mean  $\pm$  SD) for the second sample, which were significantly above chance  
475 level (50% and 0 for accuracy and  $d'$  respectively; For the first sample:  $t(43) = 14.51$ ,  $p <$   
476  $0.001$ , Cohen's  $d = 2.18$  for accuracy and  $t(43) = 13.09$ ,  $p < 0.001$ , Cohen's  $d = 2.0$  for  $d'$ ,  
477 respectively; For the second sample:  $t(27) = 13.77$ ,  $p < 0.001$ , Cohen's  $d = 2.59$  for  
478 accuracy and  $t(27) = 12.89$ ,  $p < 0.001$ , Cohen's  $d = 2.67$ , respectively), but lower than  
479 exteroceptive task accuracy of  $87.3 \pm 9.8\%$  and  $d'$  of  $2.6 \pm 0.8$  for the first sample ( $t(43) =$   
480  $-2.36$ ,  $p = 0.02$ , Cohen's  $d = 0.35$  and  $t(43) = -2.31$ ,  $p = 0.03$ , Cohen's  $d = 0.35$ ,  
481 respectively), and accuracy of  $80.9 \pm 14.7\%$  and  $d'$  of  $2.2 \pm 1.1$  for the second sample  
482 ( $t(27) = -1.83$ ,  $p = 0.08$ , Cohen's  $d = 0.35$  and  $t(27) = -2.83$ ,  $p = 0.009$ , Cohen's  $d = 0.50$ ,  
483 respectively). Participants were slower in terms of reaction time (RT) (only for the first  
484 sample) and less biased in interoceptive task than in the exteroceptive task (RT:  $t(43) =$   
485  $2.89$ ,  $p = 0.006$ , Cohen's  $d = 0.44$  for the first sample, and  $t(27) = 0.6$ ,  $p = 0.55$ , Cohen's  
486  $d = 0.12$  for the second sample;  $\beta$ :  $t(43) = -2.62$ ,  $p = 0.01$ , Cohen's  $d = 0.39$  for the first  
487 sample, and  $t(27) = -4.32$ ,  $p < 0.001$ , Cohen's  $d = 0.80$  for the second sample) (see Figure  
488 1-figure supplement 1 and 2 for details of the behavior results for the first and the second

489 sample respectively, i.e., accuracy, RT,  $d'$ , and  $\beta$ ). Across the two samples, the split-half  
490 reliability of the interoceptive and exteroceptive tasks were 0.86 and 0.85 for the first  
491 sample, and 0.68 and 0.89 for the second sample, respectively, reflecting a high internal  
492 consistency reliability of each of these two tasks.

493 For the first sample, the relative interoceptive accuracy was positively correlated  
494 with the “awareness of bodily processes” subtest of body perception questionnaire  
495 (Pearson  $r = 0.29$ ,  $p < 0.05$ , one-tailed) and negatively correlated with the subjectively  
496 scored difficulty of interoceptive task relative to exteroceptive task (Pearson  $r = -0.43$ ,  $p$   
497  $< 0.01$ , one-tailed), demonstrating the validity of the measure of interoceptive accuracy.  
498 In addition, relative interoceptive accuracy was positively correlated with trait positive  
499 affective experience (measured by Positive and Negative Affect Schedule, PANAS)  
500 (Pearson  $r = 0.31$ ,  $p < 0.05$ , one-tailed), suggesting a close relationship between explicit  
501 interoceptive attention towards bodily signals and subjective emotion experiences. No  
502 significant correlations were observed between relative interoceptive accuracy and  
503 anxiety (Pearson  $r = -0.007$ ,  $p = 0.96$ ) or depression score (Pearson  $r = -0.002$ ,  $p = 0.99$ ).  
504 For the second sample, however, we did not find significant correlations between relative  
505 interoceptive accuracy and scores of questionnaires (awareness of bodily processes:  
506 Pearson  $r = -0.17$ ,  $p = 0.40$ ; trait positive affective experience: Pearson  $r = 0.12$ ,  $p = 0.56$ ;  
507 anxiety: Pearson  $r = 0.29$ ,  $p = 0.14$ ; depression: Pearson  $r = 0.03$ ,  $p = 0.89$ ; note that we  
508 did not collect subjective score of task difficulty in the second sample).

### 509 **Imaging results of the whole brain analysis of the fMRI study of the first sample**

510 *Main effects of interoceptive attention and feedback delay, and their interaction*

511 Interoceptive attention, compared to exteroceptive attention, was associated with

512 enhanced activity in the cognitive control network (Fan, 2014; Q. Wu et al., 2015; Xuan  
513 et al., 2016), including bilateral AIC, dorsal ACC and supplementary motor area (SMA),  
514 and superior frontal and parietal cortices (frontal eye field, FEF; and areas near/along  
515 intraparietal sulcus, IPS; Figure 2a, Supplementary Table 2). In addition, this contrast  
516 revealed significant less activation, or deactivation, in the core regions of the default  
517 mode network (Raichle et al., 2001), including ventral medial prefrontal cortex (vmPFC),  
518 middle temporal gyrus, and posterior cingulate cortex (PCC).

519       Activation in the AIC, middle frontal gyrus (MFG), SMA, and temporal parietal  
520 junction (TPJ) was associated with the main effect of feedback delay, with delayed trials  
521 inducing greater activity than non-delayed trials (Figure 2b, Supplementary Table 3). The  
522 regions showing the main effect of feedback delay also showed the interaction effect  
523 between attentional focus (interoceptive and exteroceptive) and feedback (with and  
524 without delay) (Figure 2c, Supplementary Table 4). The task-induced responses extracted  
525 from bilateral AIC, defined by the attention by feedback interaction map, shows the  
526 activation pattern under different task conditions (Figure 2d). Specifically, (1) bilateral  
527 AIC demonstrated higher activity during the interoceptive task than during the  
528 exteroceptive task, irrespective of the feedback type; (2) the mismatched delayed trials  
529 induced greater activation in bilateral AIC in comparison to non-delayed trials only  
530 during the interoceptive task. The evidence of this interaction effect in the AIC suggests  
531 that the AIC was actively engaged in interoceptive processing.

### 532       *Correlation between interoceptive accuracy and AIC activity*

533       Voxel-wise regression analysis revealed the relationship between the interoceptive  
534 task-induced activity strength (map of the interaction contrast) and participants'

535 interoceptive accuracy (performance accuracy in the interoceptive task), with  
536 exteroceptive accuracy (performance accuracy in the exteroceptive task) controlled as a  
537 covariate. The greater interaction effect of bilateral AIC (and middle temporal gyrus,  
538 MTG) was associated with higher interoceptive accuracy across participants (Figure 3a,  
539 Supplementary Table 5). The AIC activation during the interoceptive task involved  
540 attending to physiological signals and matching bodily signals to external visual input,  
541 which predicts individual differences in interoceptive attention (see Figure 3b for the  
542 illustration of the effects).

543 *Functional and effective connectivity of the AIC*

544 PPI analysis showed augmented connectivity between the right AIC (as the seed)  
545 and SMA/ACC, FEF, inferior frontal gyrus (IFG), and the postcentral gyrus (PoCG)  
546 during interoceptive (versus exteroceptive) attention, in contrast to reduced connectivity  
547 between the right AIC and visual area modulated by interoceptive attention (Figure 4a,  
548 Supplementary Table 6), indicating that an increase in activity in the right AIC was  
549 associated with a greater increase in activity in FEF, IFG, and the PoCG, and more  
550 decreased activity in visual area under the condition of interoceptive compared to  
551 exteroceptive attention (Figure 4b). We found similar PPI results when using the left AIC  
552 as the seed (Figure 4-figure supplement 1).

553 Based on the PPI results, visual cortices (VC) of right V2/3 ( $x = 14, y = -90, z =$   
554  $28$  as indicated by negative PPI) and the right PoCG ( $x = 58, y = -16, z = 32$  as indicated  
555 by positive PPI) were included in the DCM model. Note that data from one participants  
556 was excluded because significant activation in V2/3 region of interest could not be  
557 identified. For model comparison, random-effects (RFX) BMS indicated that the winning



558 model (with an exceedance probability of 29.84%) was the one with the modulatory  
559 effects of interoceptive and exteroceptive attention exerting on the connection from the  
560 AIC to the PoCG and from the AIC to V2/3 (Figure 4c and Figure 4-figure supplement 2).  
561 The BMS indicated that interoceptive and exteroceptive attention are achieved through  
562 modulating the top-down connectivity from AIC to those two sensory cortices.

563 We performed parameter inference by using BMA, which takes uncertainty into  
564 account by pooling information across all models in a weighted fashion (Stephan et al.,  
565 2010). For BMA (Figure 4d), the modulatory effect of interoceptive attention was  
566 significant on the connection from the AIC to the PoCG ( $t(42) = 4.85$ , Bonferroni  
567 corrected  $p < 0.001$ ). The modulatory effect of exteroceptive attention on the connection  
568 from the AIC to V2/3 was significant without correction ( $t(42) = 2.25$ , uncorrected  $p =$   
569  $0.03$ ). The BMA results were consistent with the winning model selected by model  
570 comparison and also PPI results: the modulatory effect from the AIC to the PoCG was  
571 driven by interoceptive attention, while the modulatory effect from the AIC to V2/3 was  
572 driven by exteroceptive attention. In addition, the BMA results highlighted the  
573 importance of the intrinsic efferent connection from the AIC to the PoCG in the network  
574 ( $t(42) = 3.61$ , Bonferroni corrected  $p = 0.01$ ).

### 575 **ROI analysis results of the fMRI study of the second sample**

576 The interaction between attentional focus (interoceptive and exteroceptive) and  
577 feedback (with and without delay) was significant in both left and right AIC (left:  $F(1,27)$   
578  $= 5.77$ ,  $p = 0.024$ ; right:  $F(1,27) = 5.73$ ,  $p = 0.024$ ; Figure 5a), which confirmed the  
579 interaction effect in the bilateral AIC revealed by whole brain analyses found in the first  
580 sample. The main effect of attentional focus was significant in right AIC with higher

581 activity during the interoceptive task than during the exteroceptive task ( $F(1,27) = 9.11, p$   
582  $= 0.005$ ), but not significant in left AIC ( $F(1,27) = 2.87, p = 0.10$ ). The main effect of the  
583 feedback was not significant in neither left nor right AIC (left:  $F(1,27) < 1, p = 0.46$ ; right:  
584  $F(1,27) < 1, p = 0.45$ ). In addition, we found a significant correlation between the  
585 interaction effect of right AIC and relative interoceptive accuracy (Pearson  $r = 0.36, p =$   
586  $0.03$ , one-tailed), while the correlation between the interaction effect of left AIC and  
587 relative interoceptive accuracy was marginally significant (Pearson  $r = 0.29, p = 0.06$ ,  
588 one-tailed; Figure 5b). To further illustrate that the interaction effect of AIC is not subject  
589 to breathing effort difference, we showed the pattern of the respiratory volume under  
590 different experimental conditions (see Figure 5-figure supplement 1). Although there was  
591 a change in the respiratory volume between interoceptive and exteroceptive task conditions  
592 ( $F(1,27) = 15.88, p < 0.001$ ), this difference was canceled out by using the interaction  
593 effect ( $F < 1$ ).

594         The whole brain analysis of the second sample showed significant overlap in the  
595 main and the interaction effects between without and with physiological correction (see  
596 Figure 5-figure supplement 2). We further checked that the AIC ROI results were not  
597 dependent on the (independent) ROI selection by comparing the whole brain activation  
598 without and with physiological correction at an extremely permissive threshold ( $p < 0.05$   
599 uncorrected). The difference of the signals of the AIC between the analyses with and  
600 without physiological corrections was not significant, suggesting that the effect of the  
601 AIC was not significantly impacted by the physiological noises (see Figure 5-figure  
602 supplement 3). Altogether, these ROI results confirmed the fact that AIC was actively  
603 engaged in interoceptive processing.

604 **Lesion study results: the necessity of the AIC in interoceptive attention**

605 Figure 6 shows the insular lesion overlap for the AIC patient group. The area with  
606 the most overlap was identified as the AIC according to the literature (Kurth, Zilles, Fox,  
607 Laird, & Eickhoff, 2010; Naidich et al., 2004). For the BDT, patients with AIC lesions  
608 had significantly lower performance accuracy (58%,  $t(13) = -3.47$ ,  $p < 0.001$ ,  $B_{u[0,1.0]} =$   
609  $32.94$ , Cohen's  $d = 1.92$  compared to NC;  $t(8) = -2.35$ ,  $p = 0.009$ ,  $B_{u[0,1.0]} = 4.11$ , Cohen's  
610  $d = 1.66$  compared to BDC) (Figure 6a) and discrimination sensitivity ( $d'$ ) compared to  
611 the NCs and BDCs groups ( $t(13) = 3.62$ ,  $p < 0.001$ ,  $B_{u[0,4.0]} = 53.32$ , Cohen's  $d = 2.00$   
612 compared to NC;  $t(8) = -2.22$ ,  $p = 0.013$ ,  $B_{u[0,4.0]} = 3.56$ , Cohen's  $d = 1.60$  compared to  
613 BDC) (Figure 6b), indicating diminished interoceptive attention, while we did not find  
614 significant difference between NC and BDC (accuracy:  $t(8) = 0$ ,  $p = 0.3$ ,  $B_{u[0,1.0]} = 0.09$ ;  
615  $d'$ :  $t(8) = 0.112$ ,  $p = 0.23$ ,  $B_{u[0,4.0]} = 0.16$ ). Patients with AIC lesions did not show  
616 significant alteration in propensity to categorize 'signal' or 'noise' ( $\beta$ ) during  
617 interoceptive task (i.e., delayed vs. non-delayed) (AIC vs. NC:  $t(16) = 1.08$ ,  $p = 0.09$ ,  
618  $B_{u[0,4.0]} = 0.32$ ; AIC vs. BDC:  $t(7) = 0.37$ ,  $p = 0.18$ ,  $B_{u[0,4.0]} = 0.09$ ; BDC vs. NC:  $t(13) =$   
619  $-1.51$ ,  $p = 0.044$ ,  $B_{u[0,4.0]} = 0.45$ ) (Figure 6c). For the DDT, in contrast, patients with AIC  
620 lesions did not show abnormalities in performance, as measured by accuracy (AIC vs.  
621 NC:  $t(9) = 0.18$ ,  $p = 0.22$ ,  $B_{u[0,1.0]} = 0.09$ ; AIC vs. BDC:  $t(7) = -0.99$ ,  $p = 0.10$ ,  $B_{u[0,1.0]} =$   
622  $0.17$ ; BDC vs. NC:  $t(16) = 1.74$ ,  $p = 0.03$ ,  $B_{u[0,1.0]} = 0.29$ ),  $d'$  (AIC vs. NC:  $t(9) = 0.18$ ,  $p =$   
623  $0.22$ ,  $B_{u[0,4.0]} = 0.14$ ; AIC vs. BDC:  $t(7) = -0.83$ ,  $p = 0.12$ ,  $B_{u[0,4.0]} = 0.26$ ; BDC vs. NC:  
624  $t(16) = 1.46$ ,  $p = 0.05$ ,  $B_{u[0,4.0]} = 0.39$ ), and  $\beta$  (AIC vs. NC:  $t(15) = -0.47$ ,  $p = 0.17$ ,  $B_{u[0,4.0]}$   
625  $= 0.23$ ; AIC vs. BDC:  $t(10) = -0.11$ ,  $p = 0.23$ ,  $B_{u[0,4.0]} = 0.14$ ; BDC vs. NC:  $t(14) = -0.34$ ,  
626  $p = 0.19$ ,  $B_{u[0,4.0]} = 0.21$ ) compared to the NC and BDC groups (Figure 6d-f). Our results

627 demonstrate significant impairment in discrimination ability when attending to bodily  
628 signals, but not to external visual input, in patients with AIC lesion.

629 To test the influence of gender on task performance during interoceptive and  
630 exteroceptive attention, we compared performance discrimination sensitivity  $d'$  between  
631 males and females in NC and BDC. Neither group showed significant gender difference  
632 on both measures in the interoceptive and exteroceptive tasks ( $ps > 0.05$ ). However, male  
633 patients with AIC lesions had worse performance accuracy and  $d'$  than the NC (accuracy:  
634  $p < 0.001$ ;  $d'$ :  $p < 0.001$ ) and BDC (accuracy:  $p < 0.01$ ;  $d'$ :  $p = 0.01$ ) groups. These results  
635 provided additional evidence that deficits in interoceptive attention were associated with  
636 AIC lesions without significant gender influence and support the argument that the results  
637 were not biased by the fact that all of the AIC lesion patients were male.

### 638 Discussion

639 Using fMRI, we showed that the AIC is involved in interoceptive attention  
640 towards respiration supported by the underlying connectivity between the AIC and  
641 somatosensory cortex and visual areas for regulating interoceptive and exteroceptive  
642 attention. In addition, self-report of positive affective experience was positively  
643 correlated with interoceptive accuracy (though not significant in the second fMRI  
644 sample), which supports the notion that interoceptive attention is critical in emotional  
645 awareness (Barrett, Quigley, Bliss-Moreau, & Aronson, 2004; Bechara & Naqvi, 2004;  
646 Caruana, Jezzini, Sbriscia-Fioretti, Rizzolatti, & Gallese, 2011; Critchley et al., 2004; Gu  
647 et al., 2013; Pollatos, Kirsch, & Schandry, 2005; Seth, 2013; Terasawa, Moriguchi,  
648 Tochizawa, & Umeda, 2014; Wiens, 2005). Notably, we confirmed the necessity of the  
649 AIC in supporting interoceptive attention by showing reduced behavioral performance on

650 the interoceptive task in patients with focal AIC lesions. Thus, this study demonstrates  
651 that the AIC plays a critical role in interoceptive attention.

### 652 **The necessity of the AIC for interoceptive attention**

653 Previous functional neuroimaging studies have shown that the insula is activated  
654 in autonomic arousal and emotional reactions (Craig, 2002, 2003; Critchley et al., 2004)  
655 and emphasized the central role of the insula in interoceptive awareness. The  
656 achievement of interoceptive awareness depends on the integration of afferent bodily  
657 signals with higher order contextual information attributable to the AIC (Craig, 2002,  
658 2009; Critchley, 2005; A. R. Damasio et al., 2000; Mutschler et al., 2009). In this study,  
659 an increase in neural activation in the AIC and other related brain structures when  
660 focusing on breath rhythm indicates that the AIC supports attention toward bodily signals.  
661 Most importantly, participants' performance accuracy on the interoceptive task was  
662 significantly correlated to the activity of the AIC, further demonstrating the importance of  
663 the AIC in interoceptive attention.

664 Anatomically, the bilateral insula receives thalamo-insular projections of the  
665 interoceptive pathways (Craig, 2002). The AIC encodes subjective feelings (Craig, 2003,  
666 2009; Flynn, Benson, & Ardila, 1999) and is critical for instantaneous representation of  
667 the state of the body (Gu & FitzGerald, 2014; Gu et al., 2015). During the BDT, this is  
668 achieved by attending to bodily signals (i.e., breath rhythm) and matching them to the  
669 external visual feedback (i.e., breath curve). The present results provide additional  
670 support to previous findings that the activity of the right AIC is related to accuracy in  
671 sensing the timing of one's bodily signals, e.g., heartbeats (Critchley et al., 2004).  
672 Consistent with the notion that the AIC contributes to accurate perception of bodily states

673 (Bechara & Naqvi, 2004), the insula works as a hub to convey bodily information into  
674 internal feelings for maintaining homeostasis and to mediate representations of visceral  
675 states that link to representations of the external world (Farb, Segal, & Anderson, 2013a).

676 The critical role of the AIC in interoceptive attention identified by the fMRI data  
677 was augmented by the data from patients with focal insula damage. Relative to  
678 non-insular lesion patients and healthy controls, AIC damage led to a deficit in accuracy  
679 and sensitivity of interoceptive attention. These findings provide causal evidence  
680 demonstrating the critical role of the AIC in interoceptive attention. Traditionally, the  
681 insular cortex is considered to be a limbic sensory region that participates in the intuitive  
682 processing of complex situations (Augustine, 1996; Butti & Hof, 2010; Menon & Uddin,  
683 2010) by integrating ascending visceromotor, somatosensory inputs with attention  
684 systems via intrinsic connectivity to identify and respond to salient stimuli (Menon &  
685 Uddin, 2010; Uddin, 2015). The AIC, in particular, is a node mediating cognitive  
686 processes including bottom-up control of attention (Corbetta, Kincade, & Shulman, 2002;  
687 Corbetta, Patel, & Shulman, 2008) and conscious detection of signals arising from the  
688 autonomic nervous system (Craig, 2002; Critchley, 2004). Therefore, the behavioral  
689 deficit of interoceptive attention in AIC lesion patients is due to the disruption in the  
690 integration of the somatic and visceral inputs with the abstract representation of the  
691 present internal state (i.e. the saliency of certain type of signals). Consequently, it leads to  
692 the failure in discriminating whether the displayed respiratory curve is different from  
693 internal states.

694 **Mechanisms of the AIC in relation to interoceptive attention**

695 We can view interoceptive attention as the mechanism that coordinates the  
696 processing of bodily signals and higher-level representation of that information. It has  
697 been proposed that the AIC encodes and represents bodily information (e.g., visceral  
698 states) and transmits this information to other neural systems for advanced computations  
699 in conscious perception and decision-making (Bechara & Naqvi, 2004; Flynn et al., 1999;  
700 Gu & FitzGerald, 2014). The AIC is a key node of the large-scale network that detects  
701 information from multiple sources including objective visceral signals and generates  
702 subjective awareness (Craig, 2009; Gu et al., 2012; Gu et al., 2015; Kleckner et al., 2017;  
703 Seeley et al., 2007), as well as responding to the switch between networks that supports  
704 internal oriented processing and cognitive control (Menon, 2011; Menon & Uddin, 2010;  
705 Sridharan, Levitin, & Menon, 2008). Supporting this argument, we showed that the AIC  
706 is intrinsically connected to the somatosensory area of the PoCG and that this connection  
707 is positively modulated by interoceptive attention (relative to exteroceptive attention).

708 Other higher-level areas, e.g., the ACC/SMA, FEF, and IFG of the so-called  
709 cognitive control network (CCN) (Fan, 2014; T. Wu et al., 2017), are also involved in the  
710 interoceptive process. This is also supported by the results of the enhanced functional  
711 connectivity between the AIC and these regions. Both somatosensory afferents and a  
712 network that includes the AIC and ACC are possible pathways of interoceptive attention  
713 (Khalsa, Rudrauf, Feinstein, & Tranel, 2009; Rudrauf et al., 2009). The AIC may play a  
714 central role in integrating sensory signals from the PoCG and visual cortex and send  
715 top-down signals that guide sensation and perception through a dynamic interaction with  
716 sensory or bottom-up information. Somatosensory information concerning the internal  
717 state of the body is conveyed through the PoCG, as well as the visual signals in V2/3

718 containing the majority of external information. The top-down modulation of AIC in  
719 interoceptive attention is accomplished by augmenting the efferent signals to the  
720 somatosensory cortices. This is consistent with the argument that a first-order mapping of  
721 internal feeling is supported by insular and somatosensory cortices (A. Damasio, 2003)  
722 and that somatosensory information critically contributes to interoceptive attention  
723 (Khalsa et al., 2009).

724 In the BDT, interoceptive attention reflects combination of attention to the  
725 internal bodily signal (i.e., the breath) and the external visual stimulus (i.e., the curve). In  
726 order to better coordinate perceptual processing, the AIC may distribute and balance the  
727 processes of external and internal information. The winning model and parameter  
728 inference from DCM provides evidence that interoceptive attention is achieved mainly by  
729 modulating the connectivity between AIC and somatosensory areas (PoCG), while  
730 exteroceptive attention is primarily modulated via the connectivity between the AIC and  
731 V2/3. We propose that the dynamic adjustment of the connectivity of the AIC to sensory  
732 cortices is the foundation of interoceptive attention for bodily signals, which is critical for  
733 homeostatic regulation, and of exteroceptive attention for external objects or inputs.

#### 734 **The interoceptive task in the respiratory domain**

735 Although the neural correlates of interoceptive awareness have been studied by  
736 other tasks such as heartbeat detection task (Bechara & Naqvi, 2004; Critchley et al.,  
737 2004; Khalsa et al., 2009; Ring et al., 2015), the error rate arising from the difficulty in  
738 heartbeat counting or non-sensory process confounds are inherent to these cardioception  
739 designs (Kleckner, Wormwood, Simmons, Barrett, & Quigley, 2015; Ring et al., 2015). In  
740 contrast to cardioception, breath can be clearly perceived and autonomously controlled.



741 This feature made the present study on interoceptive attention, which requires that the  
742 target of interoception be clearly and vividly perceivable by our consciousness. The  
743 positive correlations between objective interoceptive accuracy during the BDT and  
744 subjectively scored difficulty of interoceptive task relative to exteroceptive task (i.e.,  
745 interoceptive awareness) further demonstrate that the BDT is valid in assessing  
746 interoceptive attention. We developed the BDT as a non-intrusive measurement with low  
747 cognitive load that is more practical for patients with focal brain damage than the  
748 demanding cardioception tasks.

749 It should be noted that the BDT does not represent a pure probe of interoception  
750 because respiratory processes can also be tracked using exteroceptive and proprioceptive  
751 information. It thus seems likely that participants relied on a mix of interoceptive,  
752 exteroceptive, and proprioceptive information to perform the task. In our design, we  
753 included the DDT for a measure of exteroception so that the subtraction of BDT and DDT  
754 leaves the interoceptive and proprioceptive processing components of interoception, which  
755 are the two out of three components of exteroceptive, interoceptive, and proprioceptive  
756 systems (Gu et al., 2013). In the BDT, the delayed manipulation in our study was fixed to  
757 400 ms, approximately 1/10 of an average cycle of normal healthy people which is 3~4  
758 s/cycle. It is worth trying to manipulate this delayed duration according to each  
759 individual's respiratory cycle in an effort to control subjective task difficulty across  
760 participants.

### 761 **Interoceptive attention**

762 Depending on the source of information, attention can be categorized into (1)  
763 interoceptive attention, which is directed toward bodily signals such as somatic and

764 visceral signals (e.g., in a heartbeat detection or counting task); (2) exteroceptive  
765 attention, which is directed toward primary sensory inputs from outside (e.g., visual and  
766 auditory stimuli); and (3) executive control of attention, which coordinates thoughts and  
767 actions (e.g., in Color Stroop, flanker, and working memory tasks; see review Fan (2014)).  
768 Although there are extensive studies on the attentional modulation of sensory and  
769 perceptual inputs and on the executive control of attention, it is difficult to study  
770 interoceptive attention because the vast majority of intrinsic visceral activity, except  
771 breath effort, cannot be clearly perceived under normal conditions. Using the BDT to  
772 examine attentional deployment toward breath effort enabled us to reveal the neural  
773 mechanism of interoceptive attention. In general, the perceptible, controllable,  
774 measurable, and autonomous features of breathing guaranteed more accurate and reliable  
775 measurement of individual differences in interoceptive ability.

776         As a kind of interoceptive attention that could be clearly perceived and  
777 autonomously controlled by people, the breath plays potentially important role in  
778 generating and regulating emotion. For example, mindfulness meditation, which is now  
779 well known for its role in emotion regulation and mental health (Khoury, Sharma, Rush,  
780 & Fournier, 2015), can be viewed as a practice involving interoceptive attention. One of  
781 its primary methods is to bring one's attention (the processing) and then awareness (the  
782 outcome) to the current experiences of the movement of the abdomen when breathing in  
783 and out or the breath as it goes in and out the nostrils. Given the revealed neural  
784 mechanisms of interoceptive attention in this study, it would be intuitive to predict that  
785 the AIC play an important role in meditation. Findings that meditation experience is  
786 associated with increased gray matter thickness in the AIC (Lazar et al., 2005) and

787 increased gyrification (increase in folding) of the AIC (Luders et al., 2012) support this  
788 prediction. Meditation training may enhance interoceptive attention to focus on the bodily  
789 signals so that the mind can be released from the intensive involvement of exteroceptive  
790 (the external attention) and executive control of attention (the internal attention for the  
791 coordination of thought processing) that consume the majority of mental resources.

792

### **Conclusion**

793 In summary, we provided important evidence of the involvement of the AIC in  
794 interoceptive attention by our fMRI study and further demonstrated that the AIC is  
795 critical by the lesion study. The converging evidence from these studies also suggests that  
796 interoceptive attention is achieved through top-down modulation from the AIC to the  
797 somatosensory and sensory cortices. In addition, the implementation of the interoceptive  
798 task extends the research on interoceptive processing into the respiratory domain with the  
799 validity and reliability demonstrated. It may have significant applications in studying  
800 issues related to interoceptive attention in patients with neuropsychiatric disorders such  
801 as anxiety (Avery et al., 2014) and autism (Barrett & Simmons, 2015; Quattrocki &  
802 Friston, 2014) and in patients with substance use disorders (Sönmez, Kahyacı Kılıç, Ateş  
803 Çöl, Görgülü, & Köse Çınar, 2017).

804

805

### Acknowledgements

806

We thank Dr. Thomas Beck and Dr. Tian-Yi Qian from Siemens Healthcare for

807

providing the simultaneous multi-slices EPI sequence for fMRI data acquisition. This

808

work was supported by the National Natural Science Foundation of China (grant number:

809

81729001, 81328008) to J.F. & Z.G.; J.F. was also supported by the National Institute of

810

Mental Health (NIMH) of the National Institutes of Health (NIH) under Award Number

811

R01 MH094305. Y.W. was supported by the research grant of 973 (grant number:

812

973-2015CB351800) and National Natural Science Foundation of China (grant number:

813

31771205, 61690205). Y.Y. and H.G. were supported by the Intramural Research

814

Program, National Institute on Drug Abuse, NIH. X.W. and P.L. were supported by

815

Beijing Municipal Science & Technology Commission (grant number:

816

Z161100002616014). X.W. was also supported by National Natural Science Foundation

817

of China (grant number: 81600931), Beijing Municipal Administration of Hospital'

818

Youth Programs (code: QML20170503) and Capital Health Development Research

819

Project of Beijing, China (grant number: 2016-4-1074). Q.W. was supported by China

820

Postdoctoral Science Foundation (grant number: 2016M600835). X.G. was supported by

821

the Dallas Foundation and a faculty startup grant from the University of Texas at Dallas.

822

Dr. Nicholas Van Dam and Evelyn Ramirez were involved at the early stage of the study

823

on interoception.

824

825

### **Competing interests**

826 The authors declare no competing financial interests.

827

828

829

## References

- 830 Augustine, J. R. (1996). Circuitry and functional aspects of the insular lobe in primates  
831 including humans. *Brain Res Brain Res Rev*, 22(3), 229-244.
- 832 Avery, J. A., Drevets, W. C., Moseman, S. E., Bodurka, J., Barcalow, J. C., & Simmons,  
833 W. K. (2014). Major depressive disorder is associated with abnormal interoceptive  
834 activity and functional connectivity in the insula. *Biological Psychiatry*, 76(3),  
835 258-266. doi:10.1016/j.biopsych.2013.11.027
- 836 Barrett, Lisa Feldman, Quigley, Karen S., Bliss-Moreau, Eliza, & Aronson, Keith R.  
837 (2004). Interoceptive Sensitivity and Self-Reports of Emotional Experience. *J*  
838 *Pers Soc Psychol*, 87(5), 684-697. doi:10.1037/0022-3514.87.5.684
- 839 Barrett, Lisa Feldman, & Simmons, W Kyle. (2015). Interoceptive predictions in the  
840 brain. *Nature Reviews Neuroscience*, 16(7), 419-429.
- 841 Bechara, A., & Naqvi, N. (2004). Listening to your heart: interoceptive awareness as a  
842 gateway to feeling. *Nat Neurosci*, 7(2), 102-103. doi:10.1038/nn0204-102
- 843 Brooks, Jonathan C. W., Beckmann, Christian F., Miller, Karla L., Wise, Richard G.,  
844 Porro, Carlo A., Tracey, Irene, & Jenkinson, Mark. (2008). Physiological noise  
845 modelling for spinal functional magnetic resonance imaging studies. *Neuroimage*,  
846 39(2), 680-692. doi:https://doi.org/10.1016/j.neuroimage.2007.09.018
- 847 Butti, C., & Hof, P. R. (2010). The insular cortex: a comparative perspective. *Brain Struct*  
848 *Funct*, 214(5-6), 477-493. doi:10.1007/s00429-010-0264-y
- 849 Caruana, F., Jezzini, A., Sbriscia-Fioretti, B., Rizzolatti, G., & Gallese, V. (2011).  
850 Emotional and social behaviors elicited by electrical stimulation of the insula in  
851 the macaque monkey. *Curr Biol*, 21(3), 195-199. doi:10.1016/j.cub.2010.12.042

- 852 Cohen, Eric R., Ugurbil, Kamil, & Kim, Seong-Gi. (2002). Effect of Basal Conditions on  
853 the Magnitude and Dynamics of the Blood Oxygenation Level-Dependent fMRI  
854 Response. *Journal of Cerebral Blood Flow & Metabolism*, 22(9), 1042-1053.  
855 doi:10.1097/00004647-200209000-00002
- 856 Corbetta, M., Kincade, J. M., & Shulman, G. L. (2002). Neural systems for visual  
857 orienting and their relationships to spatial working memory. *J Cogn Neurosci*,  
858 14(3), 508-523. doi:10.1162/089892902317362029
- 859 Corbetta, M., Patel, G., & Shulman, G. L. (2008). The reorienting system of the human  
860 brain: from environment to theory of mind. *Neuron*, 58(3), 306-324.  
861 doi:10.1016/j.neuron.2008.04.017
- 862 Craig, A. D. (2002). How do you feel? Interoception: the sense of the physiological  
863 condition of the body. *Nat Rev Neurosci*, 3(8), 655-666. doi:10.1038/nrn894
- 864 Craig, A. D. (2003). Interoception: the sense of the physiological condition of the body.  
865 *Current Opinion in Neurobiology*, 13(4), 500-505.  
866 doi:10.1016/s0959-4388(03)00090-4
- 867 Craig, A. D. (2009). How do you feel--now? The anterior insula and human awareness.  
868 *Nat Rev Neurosci*, 10(1), 59-70. doi:10.1038/nrn2555
- 869 Craig, A. D. (2010). The sentient self. *Brain Struct Funct*, 214(5-6), 563-577.  
870 doi:10.1007/s00429-010-0248-y
- 871 Critchley, H. D. (2004). The human cortex responds to an interoceptive challenge. *Proc*  
872 *Natl Acad Sci U S A*, 101(17), 6333-6334. doi:10.1073/pnas.0401510101
- 873 Critchley, H. D. (2005). Neural mechanisms of autonomic, affective, and cognitive  
874 integration. *J Comparative Neurology*, 493(1), 154-166. doi:10.1002/cne.20749

- 875 Critchley, H. D., Wiens, S., Rotshtein, P., Ohman, A., & Dolan, R. J. (2004). Neural  
876 systems supporting interoceptive awareness. *Nat Neurosci*, 7(2), 189-195.  
877 doi:10.1038/nn1176
- 878 Damasio, Antonio. (2003). *Looking for Spinoza: Joy, Sorrow, and the Feeling Brain*:  
879 Harcourt.
- 880 Damasio, Antonio R., Grabowski, Thomas J., Bechara, Antoine, Damasio, Hanna, Ponto,  
881 Laura L. B., Parvizi, Josef, & Hichwa, Richard D. (2000). Subcortical and cortical  
882 brain activity during the feeling of self-generated emotions. *Nat Neurosci*, 3, 1049.  
883 doi:10.1038/79871
- 884 Daubenmier, J., Sze, J., Kerr, C. E., Kemeny, M. E., & Mehling, W. (2013). Follow your  
885 breath: respiratory interoceptive accuracy in experienced meditators.  
886 *Psychophysiology*, 50(8), 777-789. doi:10.1111/psyp.12057
- 887 Davenport, P. W., Chan, P. Y., Zhang, W., & Chou, Y. L. (2007). Detection threshold for  
888 inspiratory resistive loads and respiratory-related evoked potentials. *Journal of*  
889 *Applied Physiology*, 102(1), 276-285. doi:10.1152/jappphysiol.01436.2005
- 890 Dienes, Z. (2014). Using Bayes to get the most out of non-significant results. *Front*  
891 *Psychol*, 5, 781. doi:10.3389/fpsyg.2014.00781
- 892 Dienes, Z., & McLatchie, N. (2018). Four reasons to prefer Bayesian analyses over  
893 significance testing. *Psychon Bull Rev*, 25(1), 207-218.  
894 doi:10.3758/s13423-017-1266-z
- 895 Dolan, R. J. (2002). Emotion, cognition, and behavior. *Science*, 298(5596), 1191-1194.  
896 doi:10.1126/science.1076358
- 897 Ernst, J., Boker, H., Hattenschwiler, J., Schubach, D., Northoff, G., Seifritz, E., &



- 898 Grimm, S. (2014). The association of interoceptive awareness and alexithymia  
899 with neurotransmitter concentrations in insula and anterior cingulate. *Soc Cogn*  
900 *Affect Neurosci*, 9(6), 857-863. doi:10.1093/scan/nst058
- 901 Fan, J. (2014). An information theory account of cognitive control. *Frontiers in Human*  
902 *Neuroscience*, 8, 680. doi:10.3389/fnhum.2014.00680
- 903 Farb, N. A., Segal, Z. V., & Anderson, A. K. (2013a). Attentional modulation of primary  
904 interoceptive and exteroceptive cortices. *Cerebral Cortex*, 23(1), 114-126.  
905 doi:10.1093/cercor/bhr385
- 906 Farb, N. A., Segal, Z. V., & Anderson, A. K. (2013b). Mindfulness meditation training  
907 alters cortical representations of interoceptive attention. *Soc Cogn Affect Neurosci*,  
908 8(1), 15-26. doi:10.1093/scan/nss066
- 909 Flynn, F. G., Benson, D. F., & Ardila, A. (1999). Anatomy of the insula - functional and  
910 clinical correlates. *Aphasiology*, 13(1), 55-78. doi:Doi 10.1080/026870399402325
- 911 Folstein, M. F., Folstein, S. E., & McHugh, P. R. (1975). "Mini-mental state". A practical  
912 method for grading the cognitive state of patients for the clinician. *J Psychiatr Res*,  
913 12(3), 189-198.
- 914 Friston, K. J., Buechel, C., Fink, G. R., Morris, J., Rolls, E., & Dolan, R. J. (1997).  
915 Psychophysiological and Modulatory Interactions in Neuroimaging. *NeuroImage*,  
916 6, 218-229.
- 917 Friston, K. J., Frith, C. D., Liddle, P. F., Dolan, R. J., Lammertsma, A. A., & Frackowiak,  
918 R. S. J. (1990). The Relationship between Global and Local Changes in PET  
919 Scans. *Journal of Cerebral Blood Flow & Metabolism*, 10(4), 458-466.  
920 doi:10.1038/jcbfm.1990.88

- 921 Friston, K. J., Harrison, L., & Penny, W. (2003). Dynamic causal modelling. *NeuroImage*,  
922 19(4), 1273-1302. doi:10.1016/s1053-8119(03)00202-7
- 923 Garfinkel, S. N., & Critchley, H. D. (2013). Interoception, emotion and brain: new  
924 insights link internal physiology to social behaviour. Commentary on: "Anterior  
925 insular cortex mediates bodily sensibility and social anxiety" by Terasawa et al.  
926 (2012). *Soc Cogn Affect Neurosci*, 8(3), 231-234. doi:10.1093/scan/nss140
- 927 Garfinkel, S. N., Seth, A. K., Barrett, A. B., Suzuki, K., & Critchley, H. D. (2015).  
928 Knowing your own heart: distinguishing interoceptive accuracy from  
929 interoceptive awareness. *Biological Psychology*, 104, 65-74.  
930 doi:10.1016/j.biopsycho.2014.11.004
- 931 Glover, Gary H., Li, Tie-Qiang, & Ress, David. (2000). Image-based method for  
932 retrospective correction of physiological motion effects in fMRI: RETROICOR.  
933 *Magnetic Resonance in Medicine*, 44(1), 162-167.  
934 doi:10.1002/1522-2594(200007)44:1<162::AID-MRM23>3.0.CO;2-E
- 935 Gu, X., & FitzGerald, T. H. (2014). Interoceptive inference: homeostasis and  
936 decision-making. *Trends Cogn Sci*, 18(6), 269-270. doi:10.1016/j.tics.2014.02.001
- 937 Gu, X., Gao, Z., Wang, X., Liu, X., Knight, R. T., Hof, P. R., & Fan, J. (2012). Anterior  
938 insular cortex is necessary for empathetic pain perception. *Brain*, 135(Pt 9),  
939 2726-2735. doi:10.1093/brain/aws199
- 940 Gu, Xiaosi, Hof, Patrick R., Friston, Karl J., & Fan, Jin. (2013). Anterior insular cortex  
941 and emotional awareness. *Journal of Comparative Neurology*, 521(15),  
942 3371-3388. doi:10.1002/cne.23368
- 943 Gu, Xiaosi, Wang, Xingchao, Hula, Andreas, Wang, Shiwei, Xu, Shuai, Lohrenz, Terry

- 944 M., . . . Montague, P. Read. (2015). Necessary, Yet Dissociable Contributions of  
945 the Insular and Ventromedial Prefrontal Cortices to Norm Adaptation:  
946 Computational and Lesion Evidence in Humans. *The Journal of neuroscience*,  
947 35(2), 467.
- 948 Hamilton, M. C., Schutte, N. S., & Malouff, J. M. (1976). Hamilton anxiety scale  
949 (HAMA). *Sourcebook of Adult Assessment: Applied Clinical Psychology*,  
950 154-157.
- 951 Harley, Carolyn A., & Bielajew, Catherine H. (1992). A comparison of glycogen  
952 phosphorylase a and cytochrome oxidase histochemical staining in rat brain.  
953 *Journal of Comparative Neurology*, 322(3), 377-389. doi:10.1002/cne.903220307
- 954 Hasson, U., Avidan, G., Deouell, L. Y., Bentin, S., & Malach, R. (2003). Face-selective  
955 activation in a congenital prosopagnosic subject. *J Cogn Neurosci*, 15(3), 419-431.  
956 doi:10.1162/089892903321593135
- 957 Hu, Xiaoping, Le, Tuong Huu, Parrish, Todd, & Erhard, Peter. (1995). Retrospective  
958 estimation and correction of physiological fluctuation in functional MRI.  
959 *Magnetic Resonance in Medicine*, 34(2), 201-212. doi:10.1002/mrm.1910340211
- 960 James, William. (1890). *The principles of psychology* New York. *Holt and company*.
- 961 Khalsa, S. S., Rudrauf, D., Feinstein, J. S., & Tranel, D. (2009). The pathways of  
962 interoceptive awareness. *Nat Neurosci*, 12(12), 1494-1496. doi:10.1038/nn.2411
- 963 Khoury, B., Sharma, M., Rush, S. E., & Fournier, C. (2015). Mindfulness-based stress  
964 reduction for healthy individuals: A meta-analysis. *J Psychosom Res*, 78(6),  
965 519-528. doi:10.1016/j.jpsychores.2015.03.009
- 966 Kleckner, Ian R., Wormwood, Jolie Baumann, Simmons, W. Kyle, Barrett, Lisa Feldman,

- 967           & Quigley, Karen S. (2015). Methodological recommendations for a heartbeat  
968           detection-based measure of interoceptive sensitivity. *Psychophysiology*, *52*(11),  
969           1432-1440. doi:10.1111/psyp.12503
- 970   Kleckner, Ian R., Zhang, Jiahe, Touroutoglou, Alexandra, Chanes, Lorena, Xia, Chenjie,  
971           Simmons, W. Kyle, . . . Feldman Barrett, Lisa. (2017). Evidence for a large-scale  
972           brain system supporting allostasis and interoception in humans. *Nature Human*  
973           *Behaviour*, *1*, 0069. doi:10.1038/s41562-017-0069
- 974   Knight, R. G. (1984). Some general population norms for the short form Beck Depression  
975           Inventory. *J Clin Psychol*, *40*(3), 751-753.
- 976   Kurth, F., Zilles, K., Fox, P. T., Laird, A. R., & Eickhoff, S. B. (2010). A link between the  
977           systems: functional differentiation and integration within the human insula  
978           revealed by meta-analysis. *Brain Struct Funct*, *214*(5-6), 519-534.  
979           doi:10.1007/s00429-010-0255-z
- 980   Lazar, S. W., Kerr, C. E., Wasserman, R. H., Gray, J. R., Greve, D. N., Treadway, M.  
981           T., . . . Fischl, B. (2005). Meditation experience is associated with increased  
982           cortical thickness. *Neuroreport*, *16*(17), 1893-1897.
- 983   Luders, E., Kurth, F., Mayer, E. A., Toga, A. W., Narr, K. L., & Gaser, C. (2012). The  
984           unique brain anatomy of meditation practitioners: alterations in cortical  
985           gyrification. *Frontiers in Human Neuroscience*, *6*, 34.  
986           doi:10.3389/fnhum.2012.00034
- 987   Menon, V. (2011). Large-scale brain networks and psychopathology: a unifying triple  
988           network model. *Trends Cogn Sci*, *15*(10), 483-506. doi:10.1016/j.tics.2011.08.003
- 989   Menon, V., & Uddin, L. Q. (2010). Saliency, switching, attention and control: a network

- 990 model of insula function. *Brain Struct Funct*, 214(5-6), 655-667.
- 991 doi:10.1007/s00429-010-0262-0
- 992 Mooney, Christopher Z., & Duval, Robert D. (1993). *Bootstrapping : a nonparametric*
- 993 *approach to statistical inference*. Newbury Park, Calif.: Sage Publications.
- 994 Mutschler, I., Wieckhorst, B., Kowalevski, S., Derix, J., Wentlandt, J., Schulze-Bonhage,
- 995 A., & Ball, T. (2009). Functional organization of the human anterior insular cortex.
- 996 *Neurosci Lett*, 457(2), 66-70. doi:10.1016/j.neulet.2009.03.101
- 997 Naidich, T. P., Kang, E., Fatterpekar, G. M., Delman, B. N., Gultekin, S. H., Wolfe, D., . . .
- 998 Yousry, T. A. (2004). The insula: anatomic study and MR imaging display at 1.5 T.
- 999 *AJNR Am J Neuroradiol*, 25(2), 222-232.
- 1000 Paulus, M. P., & Stein, M. B. (2010). Interoception in anxiety and depression. *Brain*
- 1001 *Struct Funct*, 214(5-6), 451-463. doi:10.1007/s00429-010-0258-9
- 1002 Penny, W., & Holmes, AP. (2007). Random effects analysis. *Statistical parametric*
- 1003 *mapping: The analysis of functional brain images*, 156-165.
- 1004 Penny, W. D., Stephan, K. E., Daunizeau, J., Rosa, M. J., Friston, K. J., Schofield, T. M.,
- 1005 & Leff, A. P. (2010). Comparing families of dynamic causal models. *PLoS*
- 1006 *Comput Biol*, 6(3), e1000709. doi:10.1371/journal.pcbi.1000709
- 1007 Pollatos, O., Kirsch, W., & Schandry, R. (2005). On the relationship between
- 1008 interoceptive awareness, emotional experience, and brain processes. *Brain Res*
- 1009 *Cogn Brain Res*, 25(3), 948-962. doi:10.1016/j.cogbrainres.2005.09.019
- 1010 Porges, S. (1993). Body Perception Questionnaire: Laboratory of Developmental
- 1011 Assessment, University of Maryland.
- 1012 Quattrocki, E, & Friston, Karl. (2014). Autism, oxytocin and interoception. *Neuroscience*

- 1013            & *Biobehavioral Reviews*, 47, 410-430.
- 1014            doi: 10.1016/j.neubiorev.2015.07.006
- 1015    Raichle, M. E., MacLeod, A. M., Snyder, A. Z., Powers, W. J., Gusnard, D. A., &
- 1016            Shulman, G. L. (2001). A default mode of brain function. *Proc Natl Acad Sci U S*
- 1017            *A*, 98(2), 676-682. doi:10.1073/pnas.98.2.676
- 1018    Ramsay, S. C., Murphy, K., Shea, S. A., Friston, K. J., Lammertsma, A. A., Clark, J.
- 1019            C., . . . Frackowiak, R. S. (1993). Changes in global cerebral blood flow in
- 1020            humans: effect on regional cerebral blood flow during a neural activation task.
- 1021            *The Journal of Physiology*, 471(1), 521-534. doi:10.1113/jphysiol.1993.sp019913
- 1022    Ring, C., Brener, J., Knapp, K., & Mailloux, J. (2015). Effects of heartbeat feedback on
- 1023            beliefs about heart rate and heartbeat counting: a cautionary tale about
- 1024            interoceptive awareness. *Biological Psychology*, 104, 193-198.
- 1025            doi:10.1016/j.biopsycho.2014.12.010
- 1026    Ronchi, R., Bello-Ruiz, J., Lukowska, M., Herbelin, B., Cabrilo, I., Schaller, K., &
- 1027            Blanke, O. (2015). Right insular damage decreases heartbeat awareness and alters
- 1028            cardio-visual effects on bodily self-consciousness. *Neuropsychologia*, 70, 11-20.
- 1029            doi:10.1016/j.neuropsychologia.2015.02.010
- 1030    Rudrauf, D., Lachaux, J. P., Damasio, A., Baillet, S., Hugueville, L., Martinerie, J., . . .
- 1031            Renault, B. (2009). Enter feelings: somatosensory responses following early
- 1032            stages of visual induction of emotion. *Int J Psychophysiol*, 72(1), 13-23.
- 1033            doi:10.1016/j.ijpsycho.2008.03.015
- 1034    Seeley, W. W., Menon, V., Schatzberg, A. F., Keller, J., Glover, G. H., Kenna, H., . . .
- 1035            Greicius, M. D. (2007). Dissociable intrinsic connectivity networks for salience

- 1036 processing and executive control. *J Neurosci*, 27(9), 2349-2356.
- 1037 doi:10.1523/JNEUROSCI.5587-06.2007
- 1038 Seth, A. K. (2013). Interoceptive inference, emotion, and the embodied self. *Trends Cogn*
- 1039 *Sci*, 17(11), 565-573. doi:10.1016/j.tics.2013.09.007
- 1040 Singer, T., Critchley, H. D., & Preuschoff, K. (2009). A common role of insula in feelings,
- 1041 empathy and uncertainty. *Trends Cogn Sci*, 13(8), 334-340.
- 1042 doi:10.1016/j.tics.2009.05.001
- 1043 Snodgrass, J. G., & Corwin, J. (1988). Pragmatics of measuring recognition memory:
- 1044 applications to dementia and amnesia. *J Exp Psychol Gen*, 117(1), 34-50.
- 1045 Sönmez, Mehmet Bülent, Kahyacı Kılıç, Evnur, Ateş Çöl, Işıl, Görgülü, Yasemin, &
- 1046 Köse Çınar, Rugul. (2017). Decreased interoceptive awareness in patients with
- 1047 substance use disorders. *Journal of Substance Use*, 22(1), 60-65.
- 1048 doi: 10.3109/14659891.2016.1143048
- 1049 Sridharan, D., Levitin, D. J., & Menon, V. (2008). A critical role for the right
- 1050 fronto-insular cortex in switching between central-executive and default-mode
- 1051 networks. *Proc Natl Acad Sci U S A*, 105(34), 12569-12574.
- 1052 doi:10.1073/pnas.0800005105
- 1053 Stanislaw, H., & Todorov, N. (1999). Calculation of signal detection theory measures.
- 1054 *Behav Res Methods Instrum Comput*, 31(1), 137-149.
- 1055 Starr, C. J., Sawaki, L., Wittenberg, G. F., Burdette, J. H., Oshiro, Y., Quevedo, A. S., &
- 1056 Coghill, R. C. (2009). Roles of the insular cortex in the modulation of pain:
- 1057 insights from brain lesions. *J Neurosci*, 29(9), 2684-2694.
- 1058 doi:10.1523/JNEUROSCI.5173-08.2009

- 1059 Stephan, K. E., Penny, W. D., Moran, R. J., den Ouden, H. E. M., Daunizeau, J., &  
1060       Friston, K. J. (2010). Ten simple rules for dynamic causal modeling. *NeuroImage*,  
1061       49(4), 3099-3109. doi:10.1016/j.neuroimage.2009.11.015
- 1062 Stephan, Klaas Enno, Penny, Will D., Daunizeau, Jean, Moran, Rosalyn J., & Friston,  
1063       Karl J. (2009). Bayesian Model Selection for Group Studies. *NeuroImage*, 46(4),  
1064       1004-1017. doi:10.1016/j.neuroimage.2009.03.025
- 1065 Stephani, C., Fernandez-Baca Vaca, G., Maciunas, R., Koubeissi, M., & Luders, H. O.  
1066       (2011). Functional neuroanatomy of the insular lobe. *Brain Struct Funct*, 216(2),  
1067       137-149. doi:10.1007/s00429-010-0296-3
- 1068 Terasawa, Y., Fukushima, H., & Umeda, S. (2013). How does interoceptive awareness  
1069       interact with the subjective experience of emotion? An fMRI study. *Hum Brain*  
1070       *Mapp*, 34(3), 598-612. doi:10.1002/hbm.21458
- 1071 Terasawa, Y., Moriguchi, Y., Tochizawa, S., & Umeda, S. (2014). Interoceptive sensitivity  
1072       predicts sensitivity to the emotions of others. *Cognition & Emotion*, 28(8),  
1073       1435-1448. doi:10.1080/02699931.2014.888988
- 1074 Tijssen, Rob H. N., Jenkinson, Mark, Brooks, Jonathan C. W., Jezzard, Peter, & Miller,  
1075       Karla L. (2014). Optimizing RetroICor and RetroKCor corrections for multi-shot  
1076       3D FMRI acquisitions. *Neuroimage*, 84, 394-405.  
1077       doi:10.1016/j.neuroimage.2013.08.062
- 1078 Tzourio-Mazoyer, Nathalie, Landeau, Brigitte, Papathanassiou, Dimitri, Crivello, Fabrice,  
1079       Etard, Olivier, Delcroix, Nicolas, . . . Joliot, Marc. (2002). Automated anatomical  
1080       labeling of activations in SPM using a macroscopic anatomical parcellation of the  
1081       MNI MRI single-subject brain. *NeuroImage*, 15(1), 273-289.



- 1082 Uddin, L. Q. (2015). Salience processing and insular cortical function and dysfunction.  
1083 *Nat Rev Neurosci*, 16(1), 55-61. doi:10.1038/nrn3857
- 1084 Uddin, L. Q., Kinnison, J., Pessoa, L., & Anderson, M. L. (2014). Beyond the tripartite  
1085 cognition-emotion-interoception model of the human insular cortex. *J Cogn*  
1086 *Neurosci*, 26(1), 16-27. doi:10.1162/jocn\_a\_00462
- 1087 Wang, X., Gu, X., Fan, J., Wang, S., Zhao, F., Hof, P. R., . . . Gao, Z. (2014). Recovery of  
1088 empathetic function following resection of insular gliomas. *J Neurooncol*, 117(2),  
1089 269-277. doi:10.1007/s11060-014-1380-y
- 1090 Watson, David. (1988). Intraindividual and interindividual analyses of positive and  
1091 negative affect: their relation to health complaints, perceived stress, and daily  
1092 activities. *Journal of personality and social psychology*, 54(6), 1020.
- 1093 Wiens, S. (2005). Interoception in emotional experience. *Curr Opin Neurol*, 18(4),  
1094 442-447.
- 1095 Windmann, S., Schonecke, O. W., Frohlig, G., & Maldener, G. (1999). Dissociating  
1096 beliefs about heart rates and actual heart rates in patients with cardiac pacemakers.  
1097 *Psychophysiology*, 36(3), 339-342.
- 1098 Wu, Qiong, Chang, Chi-Fu, Xi, Sisi, Huang, I. Wen, Liu, Zuxiang, Juan, Chi-Hung, . . .  
1099 Fan, Jin. (2015). A critical role of temporoparietal junction in the integration of  
1100 top-down and bottom-up attentional control. *Hum Brain Mapp*, 36(11),  
1101 4317-4333. doi:10.1002/hbm.22919
- 1102 Wu, T., Dufford, A. J., Egan, L. J., Mackie, M. A., Chen, C., Yuan, C., . . . Fan, J. (2017).  
1103 Hick-Hyman Law is Mediated by the Cognitive Control Network in the Brain.  
1104 *Cereb Cortex*, 1-16. doi:10.1093/cercor/bhx127

- 1105 Xuan, Bin, Mackie, Melissa-Ann, Spagna, Alfredo, Wu, Tingting, Tian, Yanghua, Hof,  
1106 Patrick R., & Fan, Jin. (2016). The activation of interactive attentional networks.  
1107 *Neuroimage*, 129, 308-319. doi:10.1016/j.neuroimage.2016.01.017
- 1108

1109

1110

### Figure Captions

1111 **Figure 1.** Experimental setup, trial structure of the tasks, and stimulus conditions. (a) The  
1112 respiratory effort is converted to electronic signal changes using a respiratory transducer,  
1113 amplified by BIOPAC, digitized using an A/D converter, and sent to the test computer for  
1114 the final visual displays as a dynamic breath curve, with or without a 400-ms delay. (b)  
1115 This panel shows two trials for breath delay detection task (BDT) and flash dot detection  
1116 task (DDT) runs, respectively. Each trial begins with a 3-s blank display, followed by a  
1117 12-s display of respiratory curve presented with or without a 400 ms delay and with or  
1118 without a 30 ms red dot flashed at a random position of the curve, and ended with a 3-s  
1119 response window during which participants make a forced-choice button-press response  
1120 to two alternative choices depending on the block type (BDT or DDT) to indicate  
1121 whether the feedback curve was synchronous or delayed (for the BDT block) or whether  
1122 a dot appeared (for the DDT block). (c) The task represents a  $2 \times 2 \times 2$  factorial design  
1123 with the factors of attention to breath or dot (block design), and presence or absence of  
1124 breath curve delay, and presence or absence of a dot flashed.

1125 **Figure 1-figure supplement 1.** Box plots visualizing the five-number summary  
1126 (minimum, lower quartile, median, upper quartile and maximum) for (a) accuracy, (b)  
1127 reaction time, (c)  $d'$ , and (d) beta for BDT and DDT tasks in the first sample of fMRI  
1128 study. The dots are outliers.

1129 **Figure 1-figure supplement 2.** Box plots visualizing the five-number summary  
1130 (minimum, lower quartile, median, upper quartile and maximum) for (a) accuracy, (b)  
1131 reaction time, (c)  $d'$ , and (d) beta for BDT and DDT tasks in the second sample of fMRI

1132 study. The dots are outliers.

1133 **Figure 2.** Main effects and the interaction for the whole brain analysis of the first sample.

1134 (a) Main effect of interoceptive attention (interoceptive task vs. exteroceptive task). (b)

1135 Main effect of breath curve feedback condition (delayed curve vs. non-delayed curve). (c)

1136 Interaction between attention type and breath-curve feedback condition ( $[\text{delayed} -$

1137  $\text{non-delayed}]_{\text{interoceptive task}} - [\text{delayed} - \text{non-delayed}]_{\text{exteroceptive task}}$ ). (d) The activation of

1138 the left and right AIC activity under the four task conditions, and the pattern of the

1139 interaction.

1140 **Figure 3.** The relationship between brain activity and behavioral performance across

1141 participants. (a) This was revealed in a regression analysis of contrast images for the

1142 interaction between interoceptive attention deployment (interoception vs. exteroception)

1143 and breath curve feedback condition (delayed vs. no-delayed), with performance

1144 accuracy on interoceptive and on exteroceptive tasks as regressor-of-interest and

1145 covariate, respectively. AIC, anterior insular cortex; MTG, middle temporal gyrus. (b)

1146 The correlational patterns between the interaction effect of bilateral AIC and relative

1147 interoceptive accuracy. The data were normalized as z-scores.

1148 **Figure 4.** PPI and DCM results of the first fMRI sample. (a) Regions showing positive

1149 (red) and negative (blue) associations with AIC activation modulated by interoceptive

1150 attention (relative to exteroceptive attention). (b) An increase in activation in the right

1151 AIC was associated with an increase in activation in the posterior central gyrus (PoCG)

1152 and a decrease in activation in visual cortex (VC, V2/3) under the condition of

1153 interoceptive attention. (c) Five base models generated by specifying possible

1154 modulations of interoceptive and exteroceptive attention on the four endogenous

1155 connections between ROIs. The model with a dashed-line rectangle surrounded indicates  
1156 the winning model revealed by fixed-effects and random-effects Bayesian model  
1157 selection (BMS). (d) The intrinsic efferent connection from the AIC to the PoCG was  
1158 significant. The modulatory effect of interoceptive attention on the connection from the  
1159 AIC to the PoCG was significant. The modulatory effect of exteroceptive attention on the  
1160 connection from AIC to V2/3 was significant (uncorrected).

1161 **Figure 4-figure supplement 1.** Regions showed positive (red) and negative (blue)  
1162 connectivity with left AIC (as the seed) modulated by interoceptive attention (relative to  
1163 exteroceptive attention) for the first fMRI sample.

1164 **Figure 4-figure supplement 2.** The exceedance probability of RFX BMS for the first  
1165 fMRI sample. Across all 52 models, M20 outperformed the other models, and thus was  
1166 identified as the optimal model. M20 denotes the model with the modulatory effects of  
1167 interoceptive and exteroceptive attention exerting on the connection from the AIC to the  
1168 PoCG and to V2/3.

1169 **Figure 5.** fMRI ROI results of the second sample. (a) ROI analysis of the parameter  
1170 estimates of the left and right AIC for 4 experimental conditions. Error bars represent  
1171 95% confidence intervals. (b) The correlation between the interaction effect of bilateral  
1172 AIC and relative interoceptive accuracy. The data were normalized as z-scores.

1173 **Figure 5-figure supplement 1.** Respiratory volumes under the 4 experimental conditions  
1174 from the second fMRI sample. Error bars represent 95% confidence intervals.

1175 **Figure 5-figure supplement 2.** Activation maps without and with RETROICOR  
1176 correction for the second fMRI sample. (a) Main effect of interoceptive attention  
1177 (interoceptive task vs. exteroceptive task). (b) Main effect of breath curve feedback

1178 condition (delayed vs. non-delayed). (c) Interaction between attention type and  
1179 breath-curve feedback condition ( $[\text{delayed} - \text{non-delayed}]_{\text{interoceptive task}} - [\text{delayed} -$   
1180  $\text{non-delayed}]_{\text{exteroceptive task}}$ ).

1181 **Figure 5-figure supplement 3.** Paired t-test on beta maps obtained without and with  
1182 RETROICOR correction for the second fMRI sample. The RETROICOR correction did  
1183 not show a decrease on the AIC activation compared to that without the correction,  
1184 suggesting that the effect of AIC was not significantly impacted by the physiological  
1185 noises. (a) Main effect of interoceptive attention (interoceptive task vs. exteroceptive  
1186 task). (b) Main effect of breath curve feedback condition (delayed vs. non-delayed). (c)  
1187 Interaction between attention type and breath-curve feedback condition ( $[\text{delayed} -$   
1188  $\text{non-delayed}]_{\text{interoceptive task}} - [\text{delayed} - \text{non-delayed}]_{\text{exteroceptive task}}$ ).

1189 **Figure 6.** Reconstruction of anterior insular cortex lesions of six patients. Red color  
1190 indicates 100% overlap. Left lesions were flipped to the right side in order to map the  
1191 lesion overlap.

1192 **Figure 7.** Behavioral results of the lesion study. (a, b, c) the interoceptive task  
1193 performance, and (d, e, f) the exteroceptive task performance. For the interoceptive  
1194 attention task, patients with AIC lesions had significantly lower performance in accuracy  
1195 and  $d'$  compared to NC and BDC groups, but did not show significant alteration in  $\beta$   
1196 during interoceptive task. For the exteroceptive task, patients with AIC lesions did not  
1197 show abnormality in performance in accuracy,  $d'$ , and  $\beta$  compared to either the NC or  
1198 BDC groups. NC, normal control; BDC, brain damage control. Dashed line: chance level.

1199

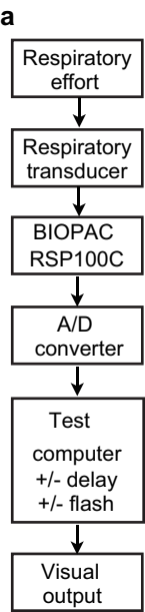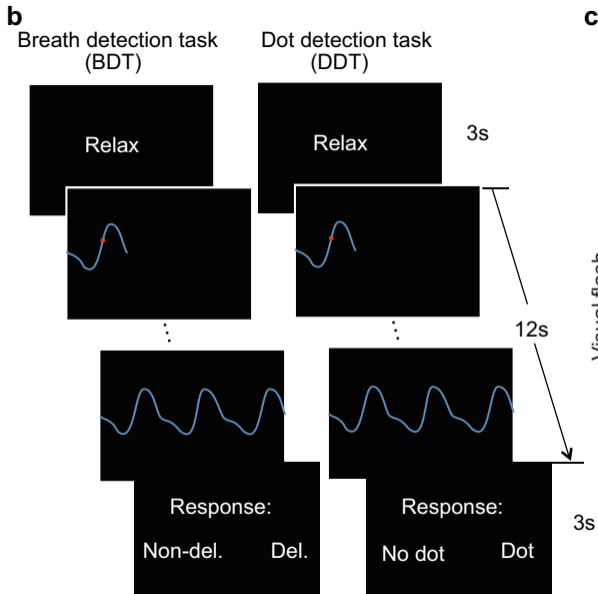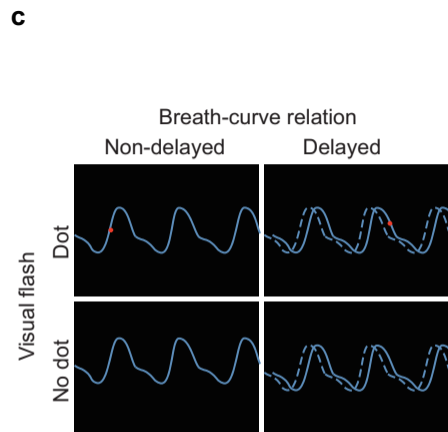

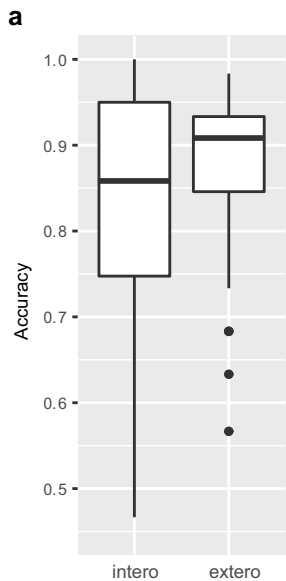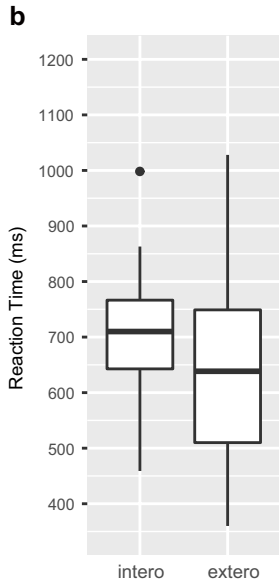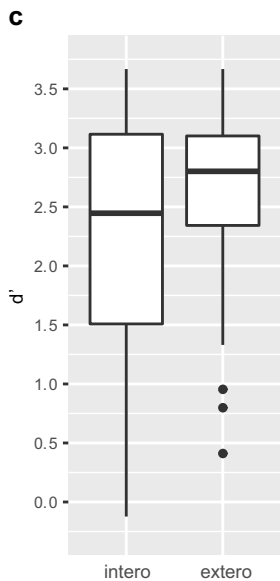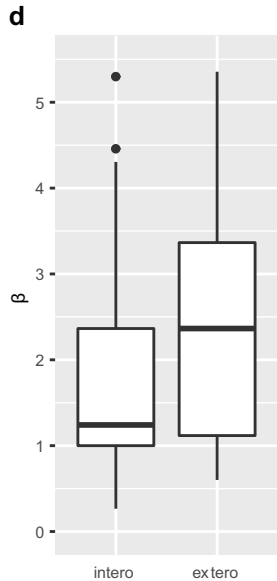



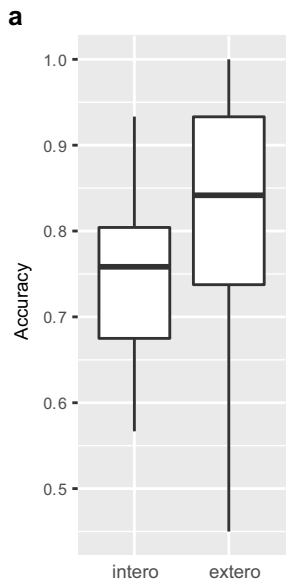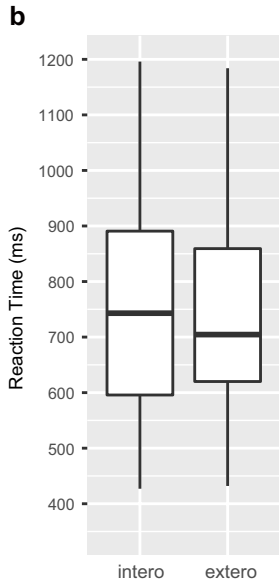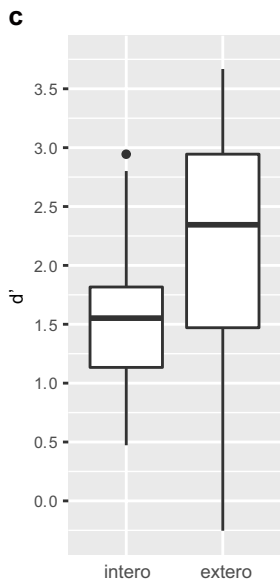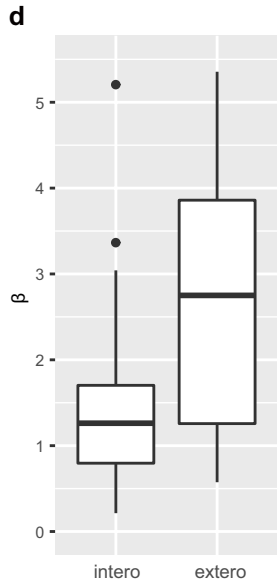

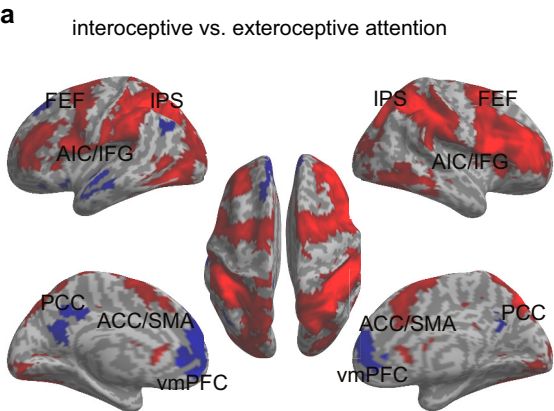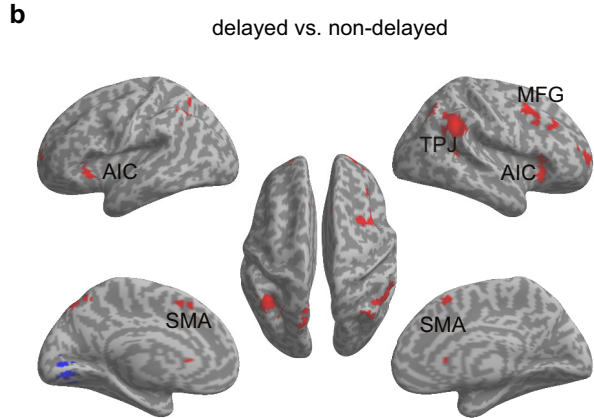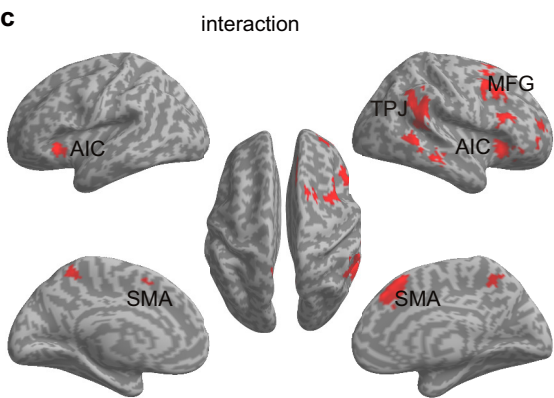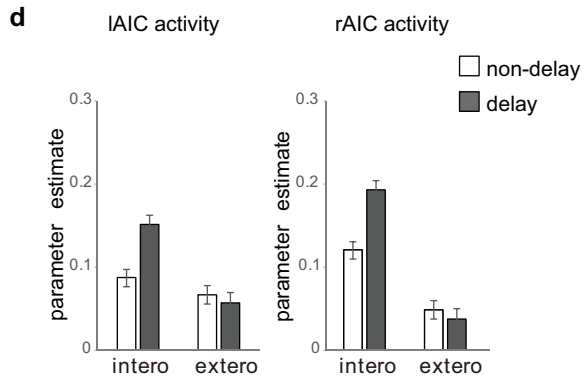

**a**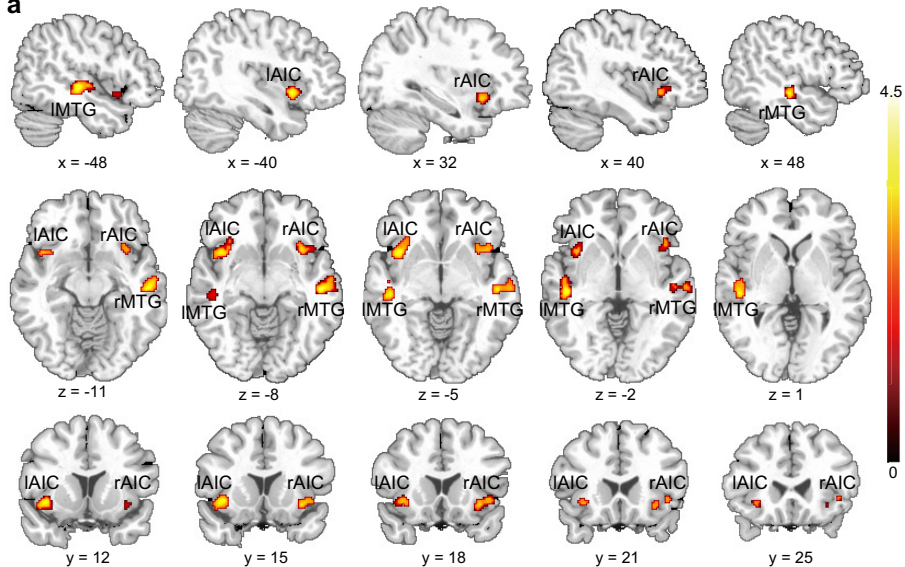**b**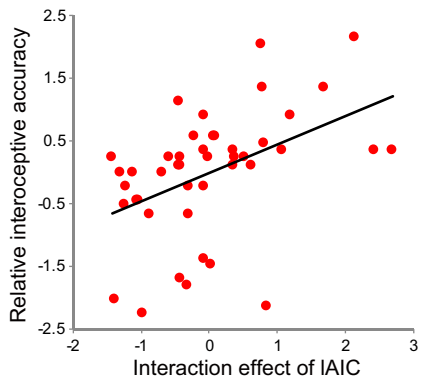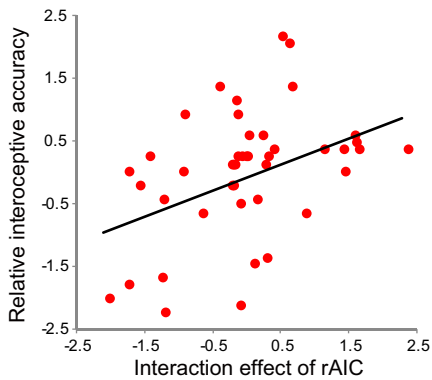

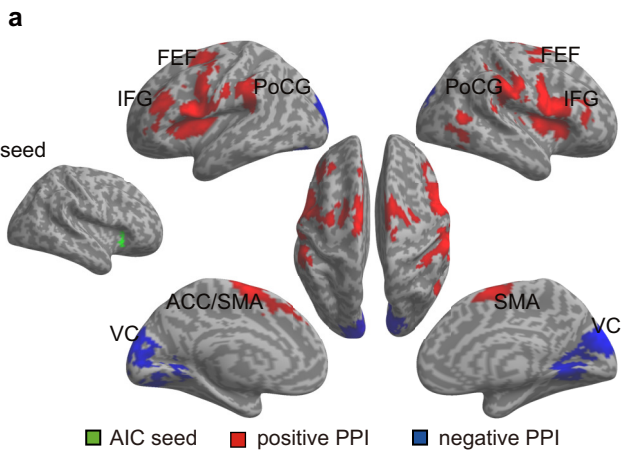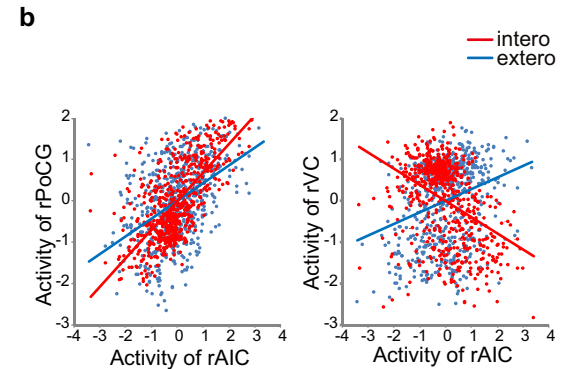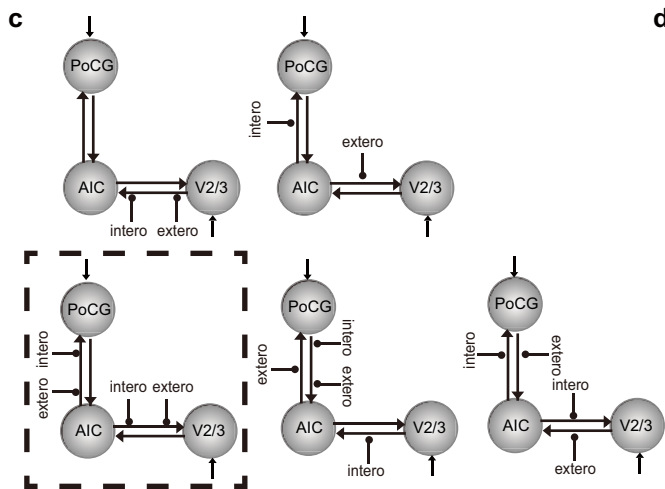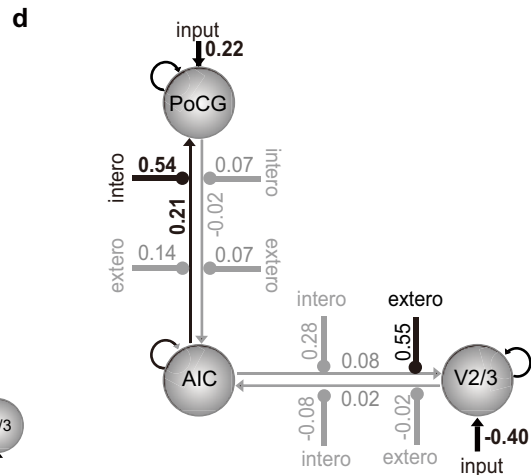

seed

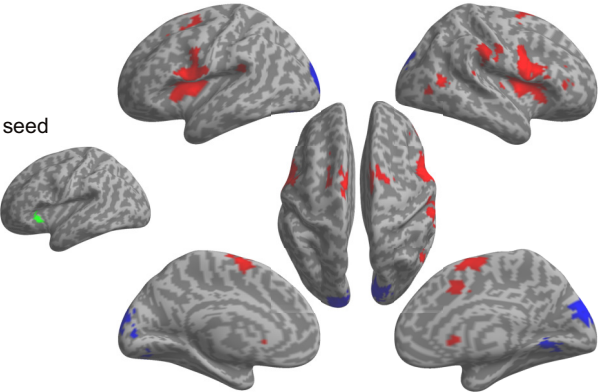

■ AIC seed

■ positive PPI

■ negative PPI

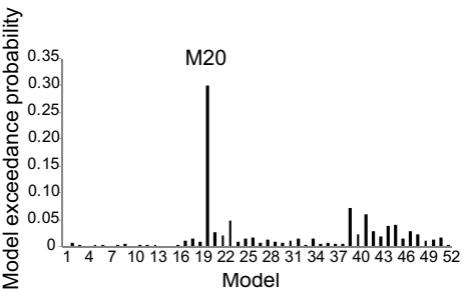

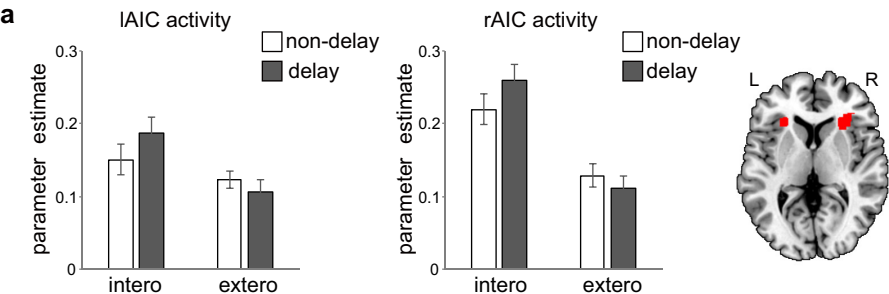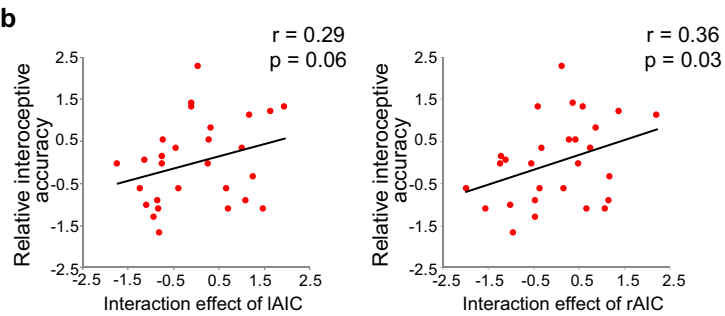

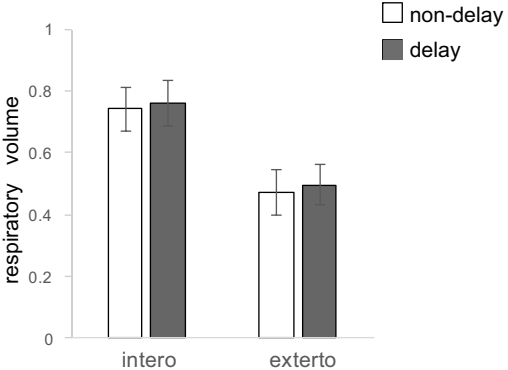



**a**

interoceptive vs. exteroceptive attention

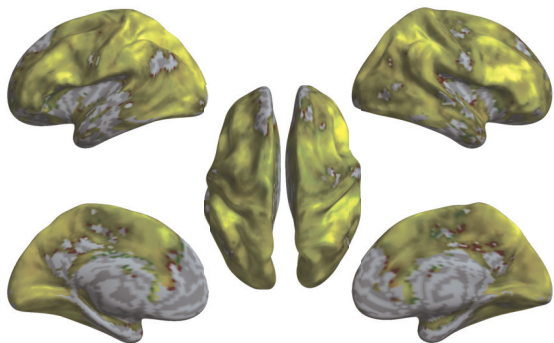**b**

delayed vs. non-delayed

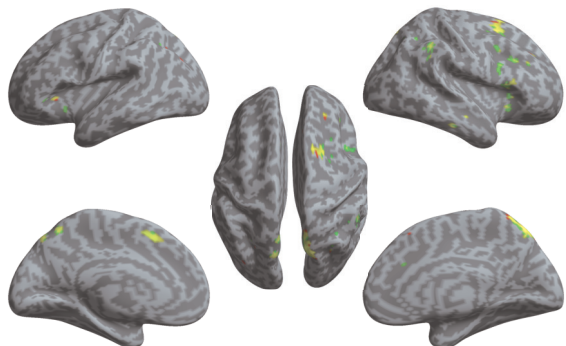**c**

interaction

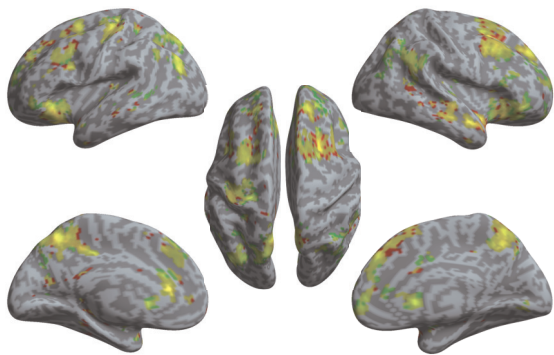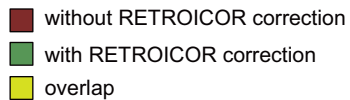

**a**

interoceptive vs. exteroceptive attention

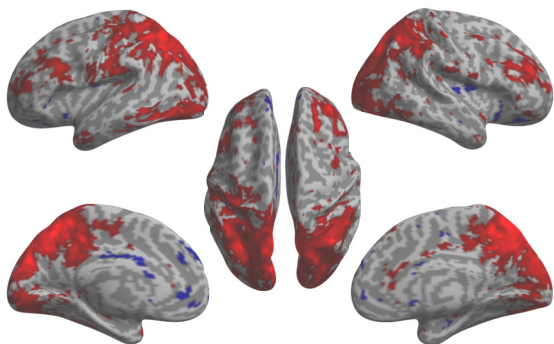**b**

delayed vs. non-delayed

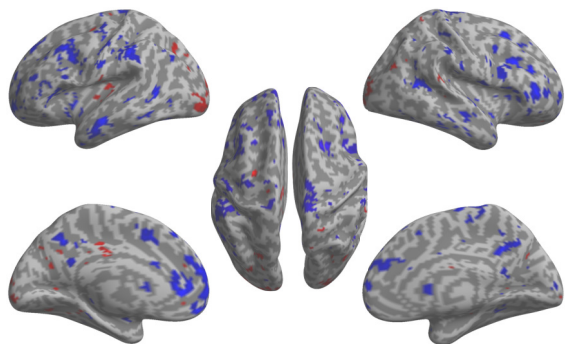**c**

interaction

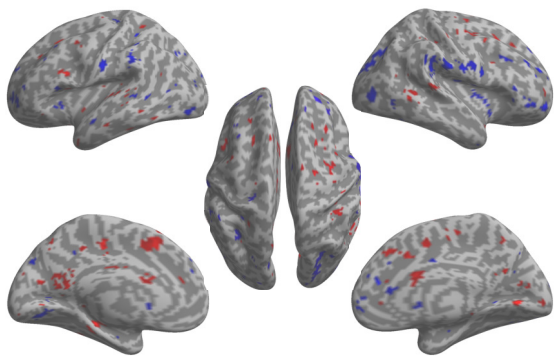

■ without vs. with correction  
■ with vs. without correction

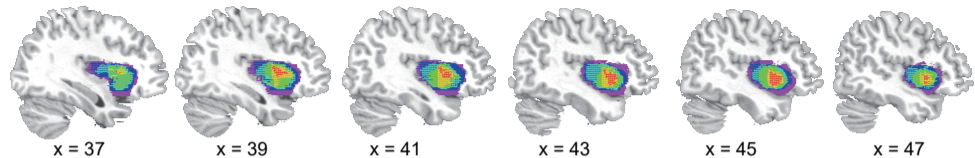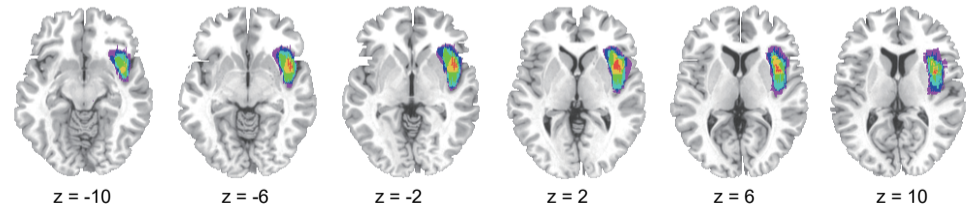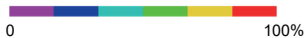

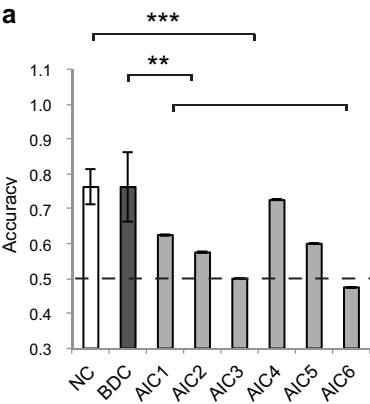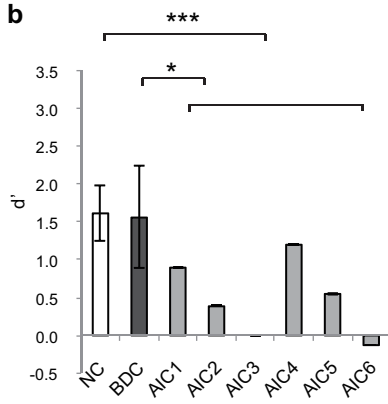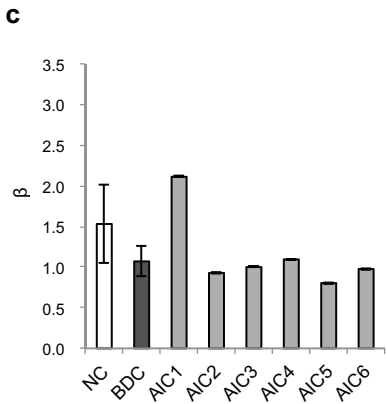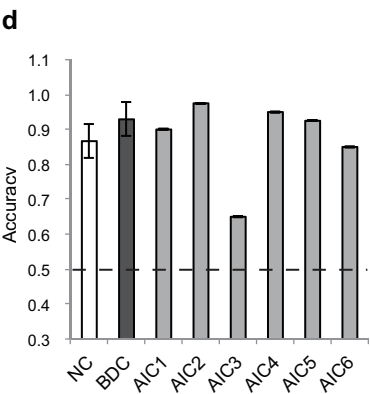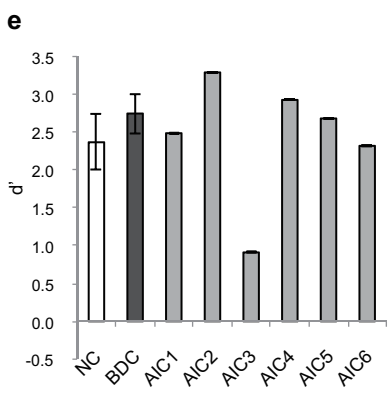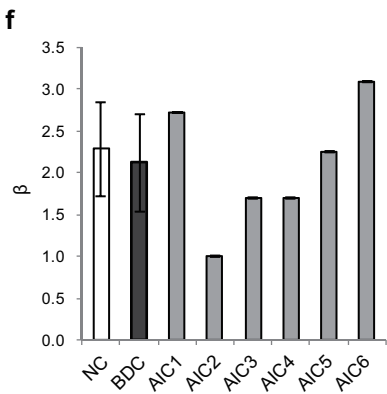

Source: http://biorxiv.org/content/10.1101/464867v1.full.pdf
